# Supplementary material for: Accuracy of congenital anomaly coding in live birth children recorded in European health care databases, a EUROlinkCAT study
Source: Springer Nature journal article supplement (doi:10.1007/s10654-023-00971-z), 2023-02-18

# Anomalies detectable at birth

Estimates for sensitivity per registry, pooled estimates per group and overall pooled estimate.

NA indicates that the number and/or the estimate cannot be reported because of release restrictions for small numbers.

CAROBB: Thames Valley  
 WANDA: Wessex  
 EMSCYAR: East Midlands and South Yorkshire

# Spina bifida

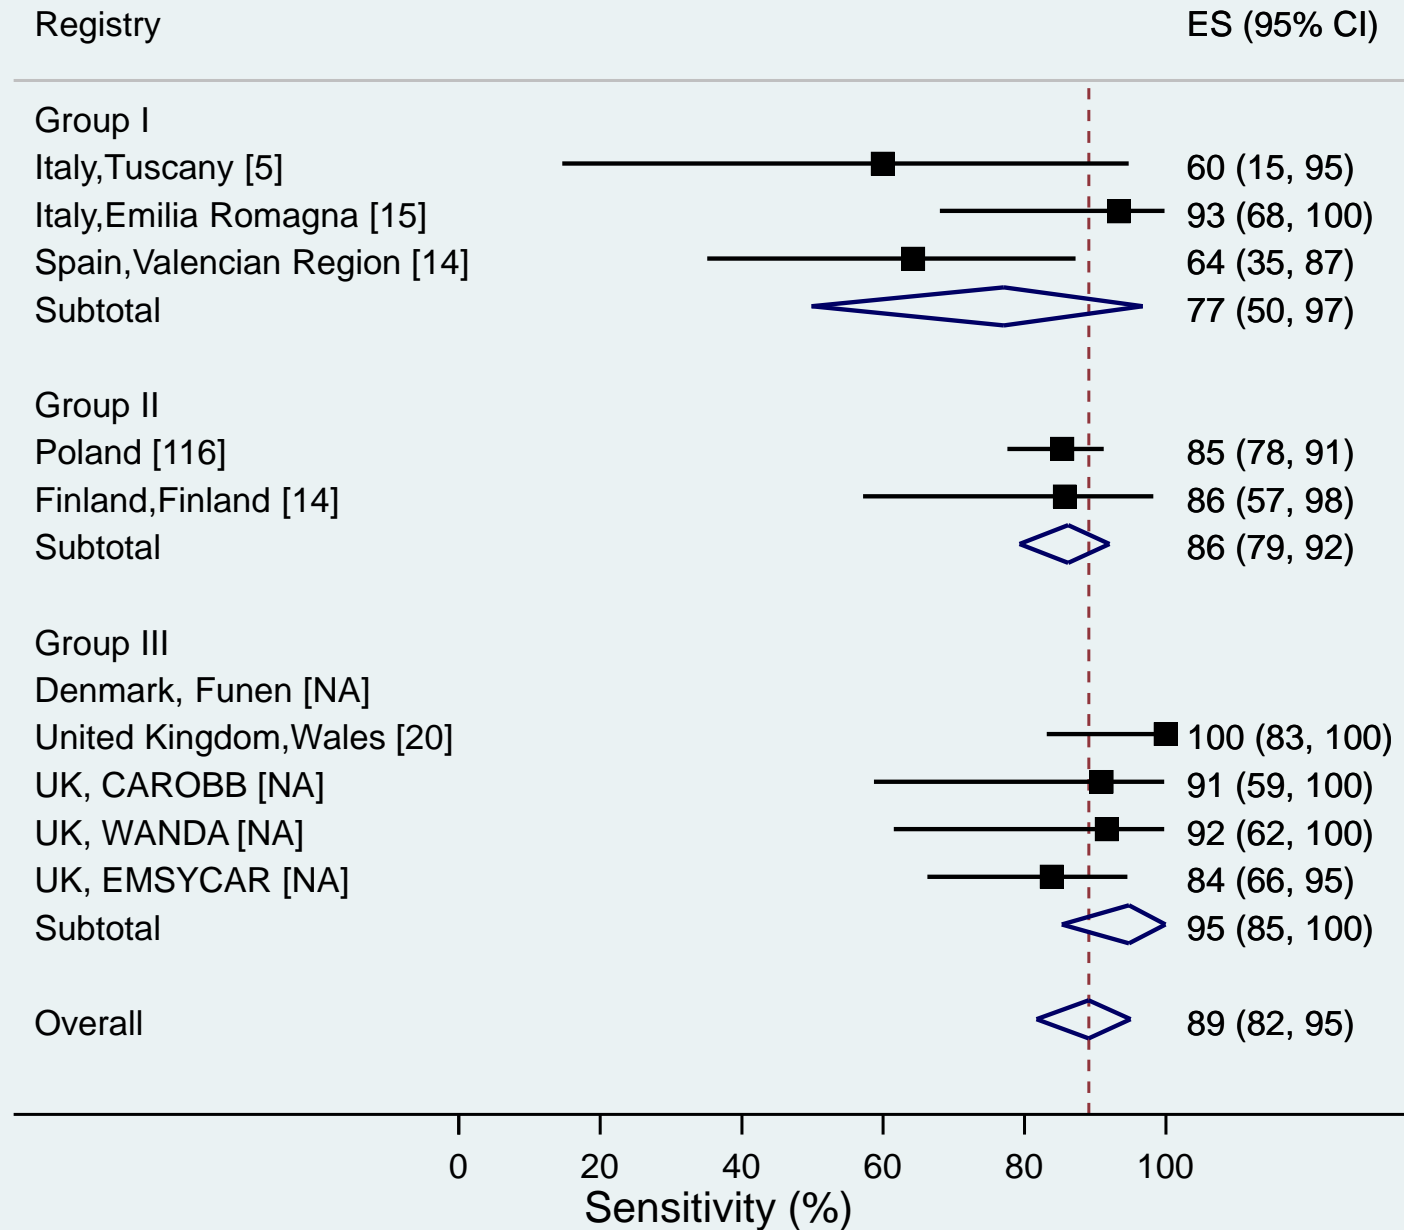

## Anomalies detectable at birth

Estimates for sensitivity per registry, pooled estimates per group and overall pooled estimate.

NA indicates that the number and/or the estimate cannot be reported because of release restrictions for small numbers.

CAROBB: Thames Valley  
 WANDA: Wessex  
 EMSCYAR: East Midlands and South Yorkshire

## Cleft lip with or without cleft palate

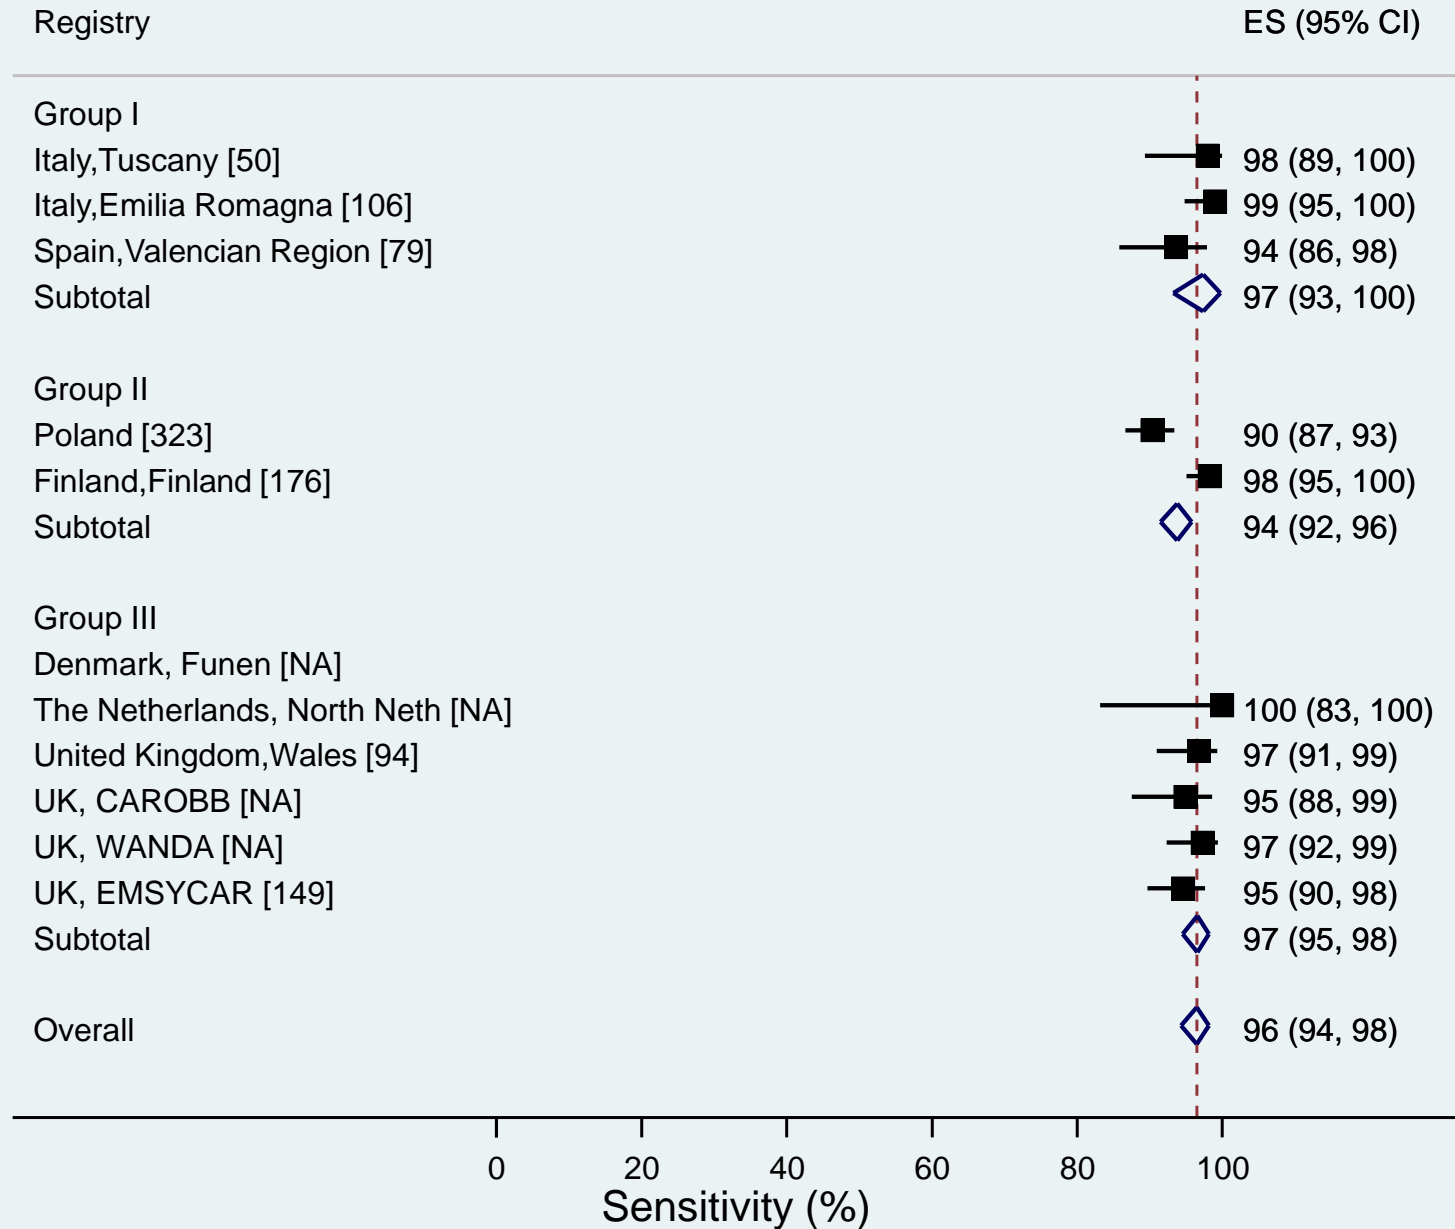

## Anomalies detectable at birth

Estimates for sensitivity per registry, pooled estimates per group and overall pooled estimate.

NA indicates that the number and/or the estimate cannot be reported because of release restrictions for small numbers.

CAROBB: Thames Valley  
 WANDA: Wessex  
 EMSCYAR: East Midlands and South Yorkshire

## Cleft palate

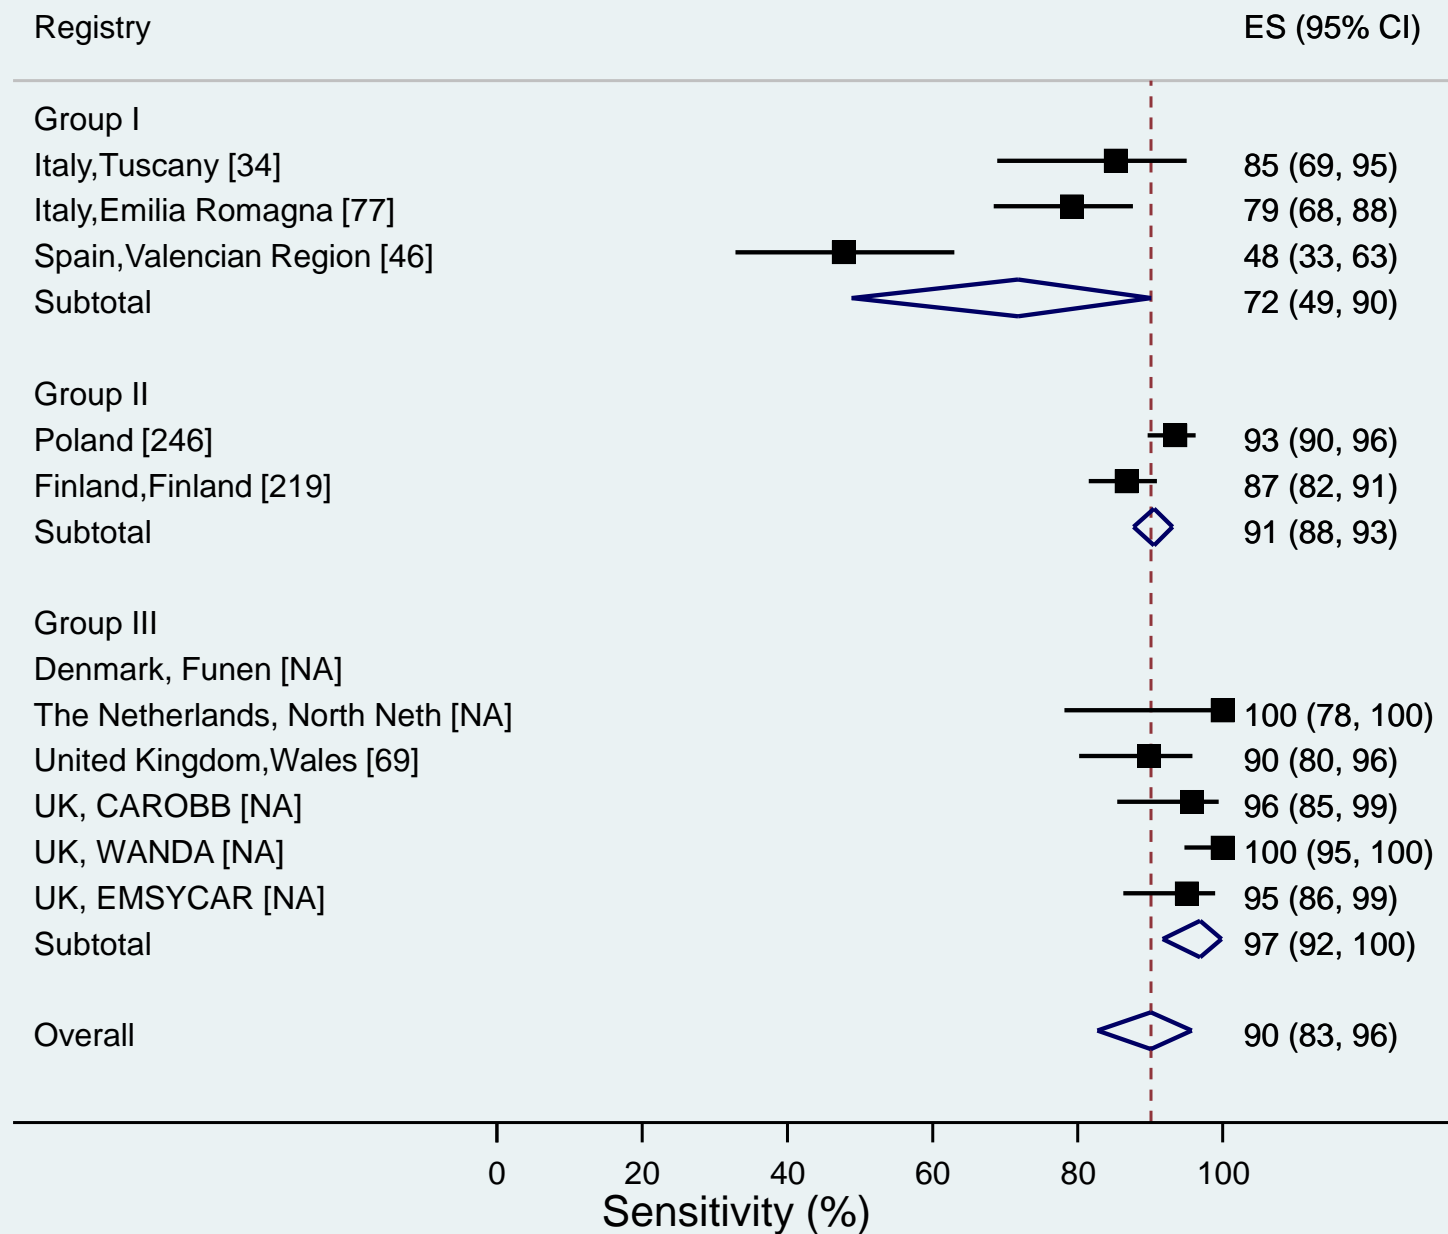

# Anomalies detectable at birth

Estimates for sensitivity per registry, pooled estimates per group and overall pooled estimate.

NA indicates that the number and/or the estimate cannot be reported because of release restrictions for small numbers.

CAROBB: Thames Valley  
WANDA: Wessex  
EMSCYAR: East Midlands and South Yorkshire

# Gastroschisis

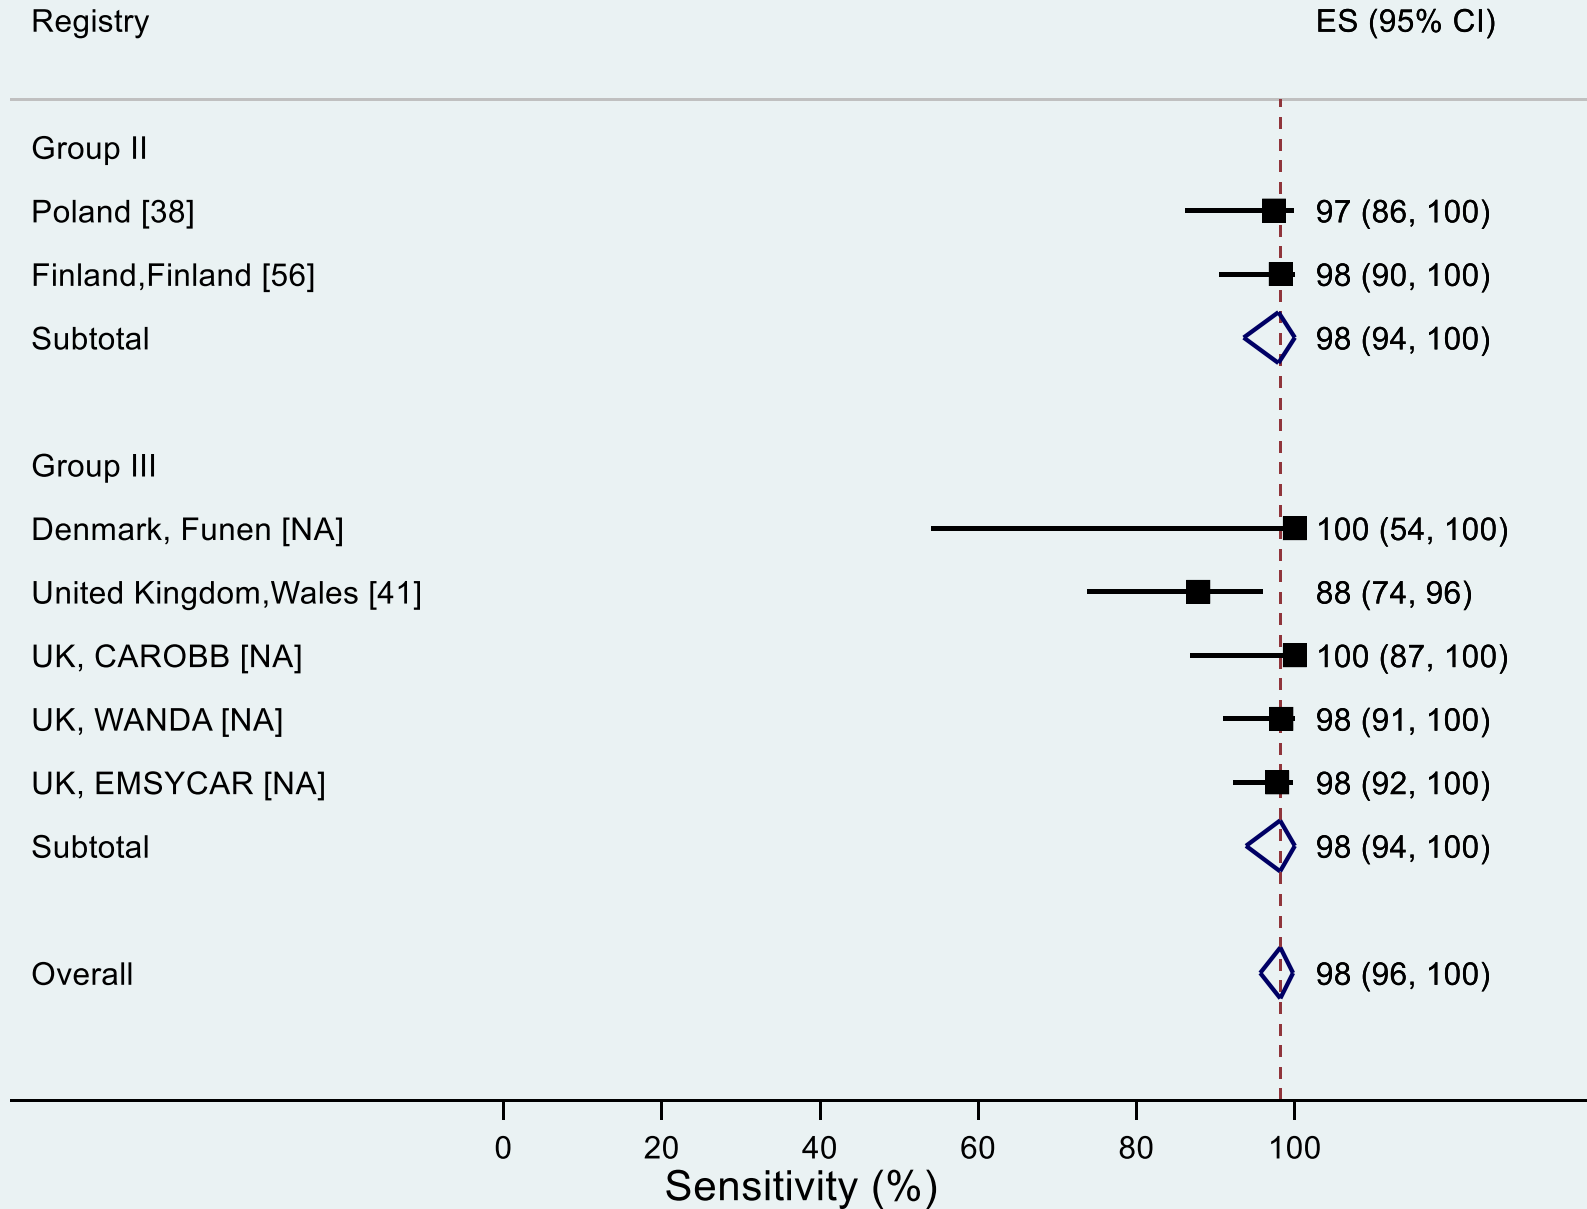

# Anomalies detectable at birth

Estimates for sensitivity per registry, pooled estimates per group and overall pooled estimate.

NA indicates that the number and/or the estimate cannot be reported because of release restrictions for small numbers.

CAROBB: Thames Valley  
WANDA: Wessex  
EMSCYAR: East Midlands and South Yorkshire

# Omphalocele

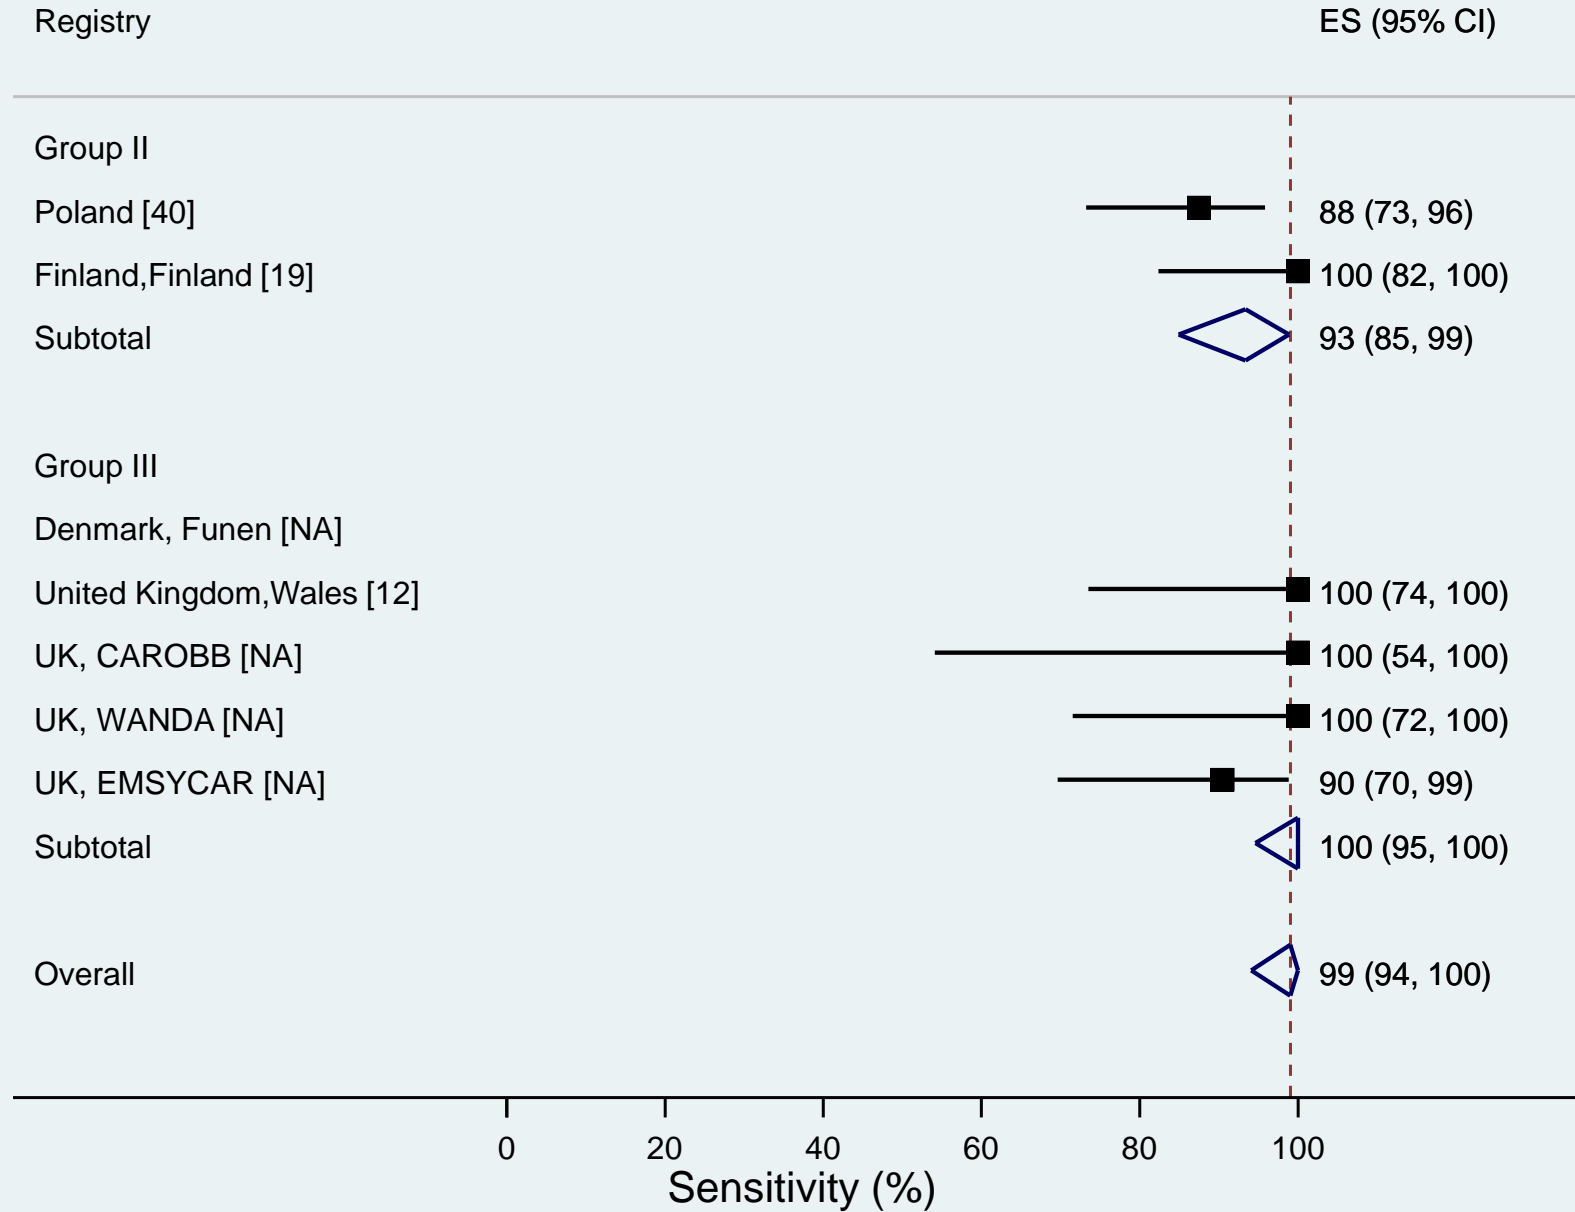

## Anomalies detectable at birth

Estimates for sensitivity per registry, pooled estimates per group.

NA indicates that the number and/or the estimate cannot be reported because of release restrictions for small numbers.

CAROB: Thames Valley  
 WANDA: Wessex  
 EMSYAR: East Midlands and South Yorkshire

## Clubfoot

Registry ES (95% CI)

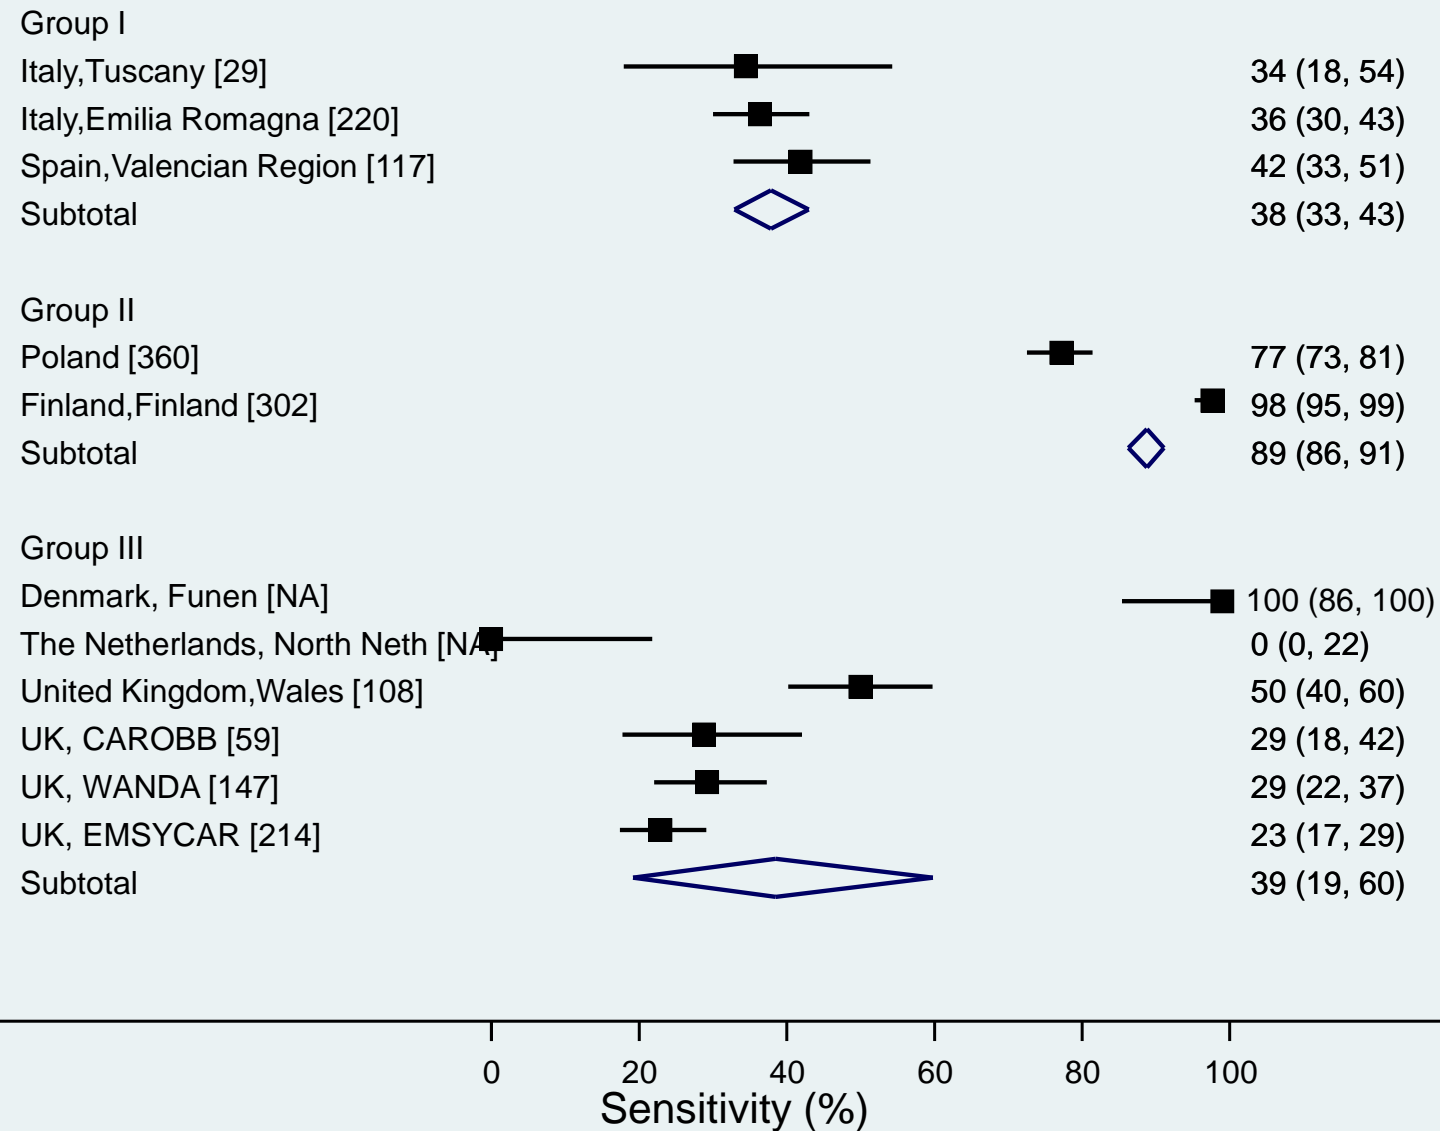

## Anomalies with a high prenatal detection rate

Estimates for sensitivity per registry, pooled estimates per group and overall pooled estimate.

NA indicates that the number and/or the estimate cannot be reported because of release restrictions for small numbers.

CARobb: Thames Valley  
 WANDA: Wessex  
 EMSYCAR: East Midlands and South Yorkshire

## Hypoplastic left heart syndrome

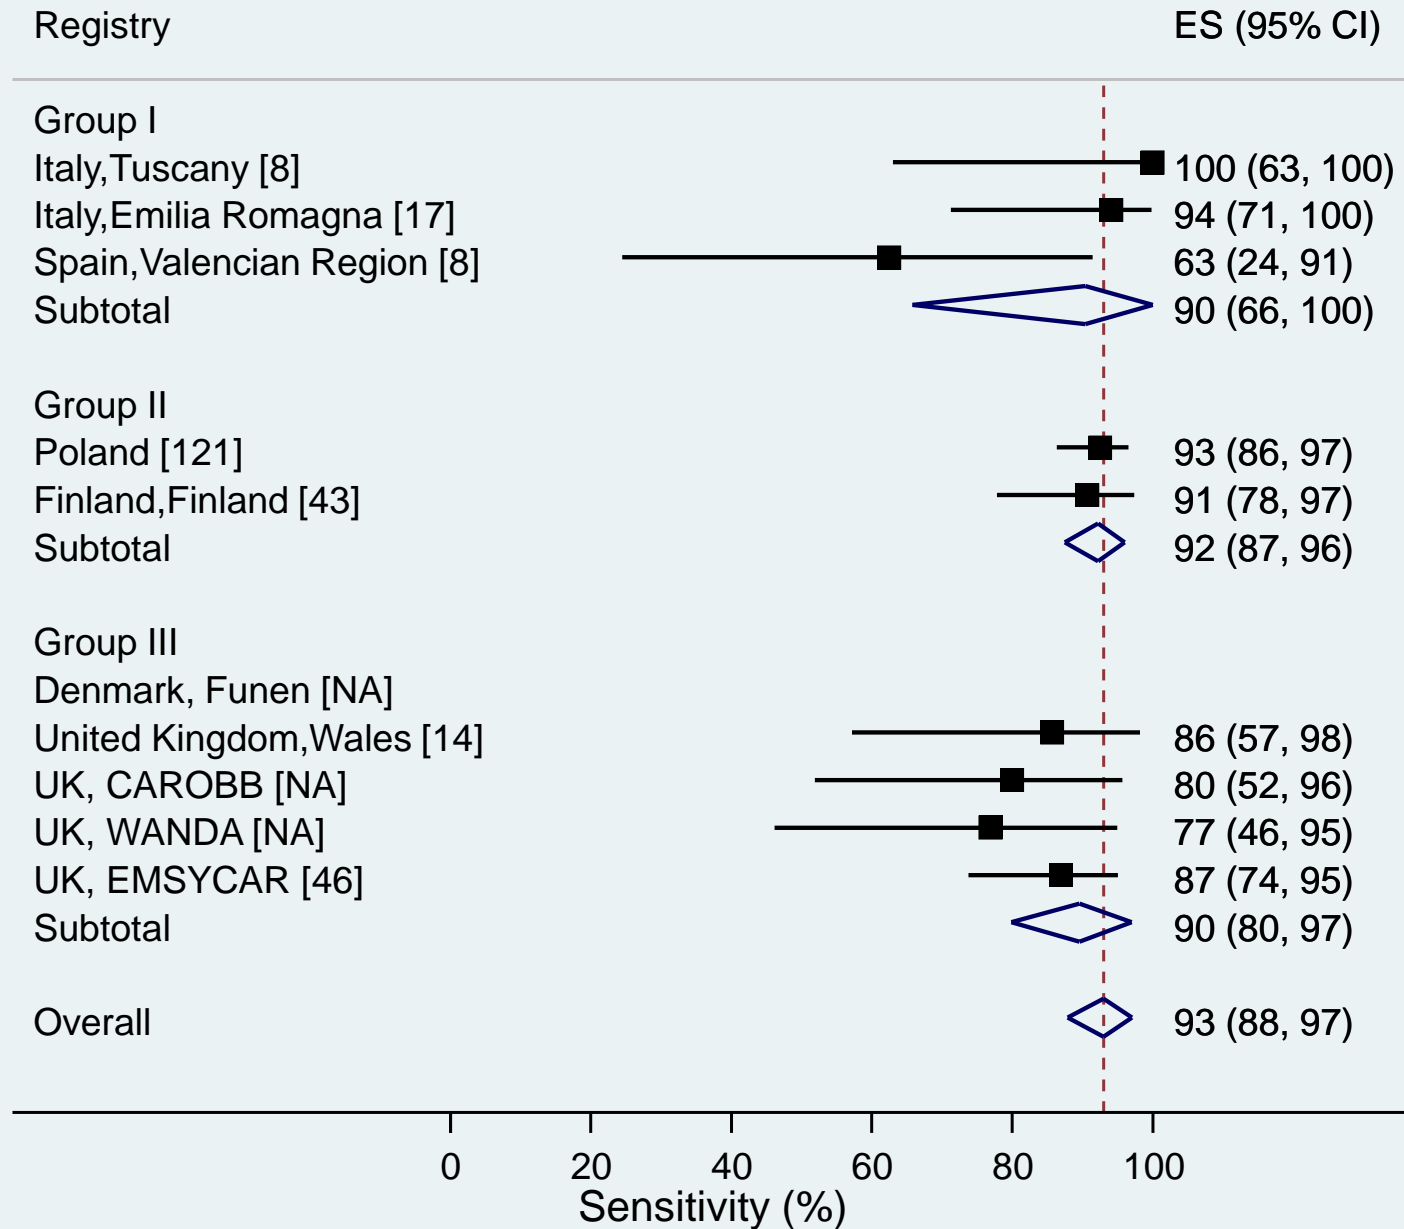

## Anomalies with a high prenatal detection rate

Estimates for sensitivity per registry, pooled estimates per group.

NA indicates that the number and/or the estimate cannot be reported because of release restrictions for small numbers.

CAROB: Thames Valley  
 WANDA: Wessex  
 EMSCYAR: East Midlands and South Yorkshire

## Unilateral renal agenesis

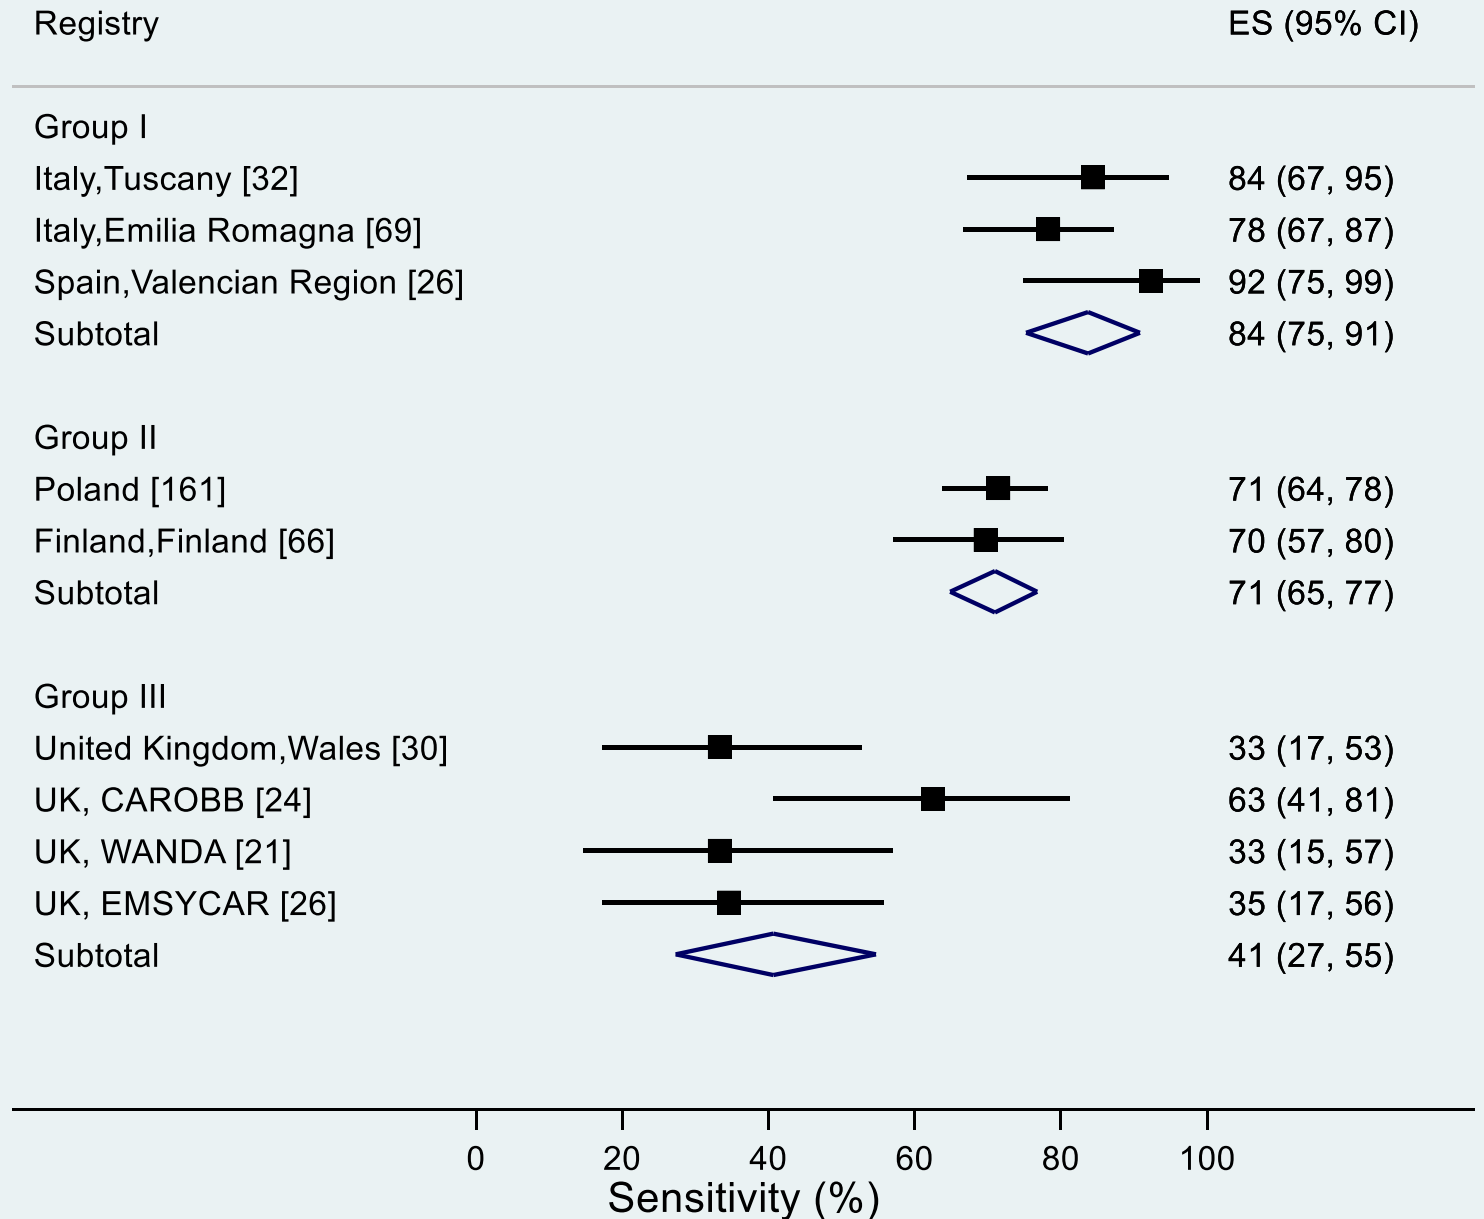



## Anomalies with a high prenatal detection rate

Estimates for sensitivity per registry, pooled estimates per group.

NA indicates that the number and/or the estimate cannot be reported because of release restrictions for small numbers.

CAROBB: Thames Valley  
 WANDA: Wessex  
 EMSYCAR: East Midlands and South Yorkshire

## Limb reduction defects

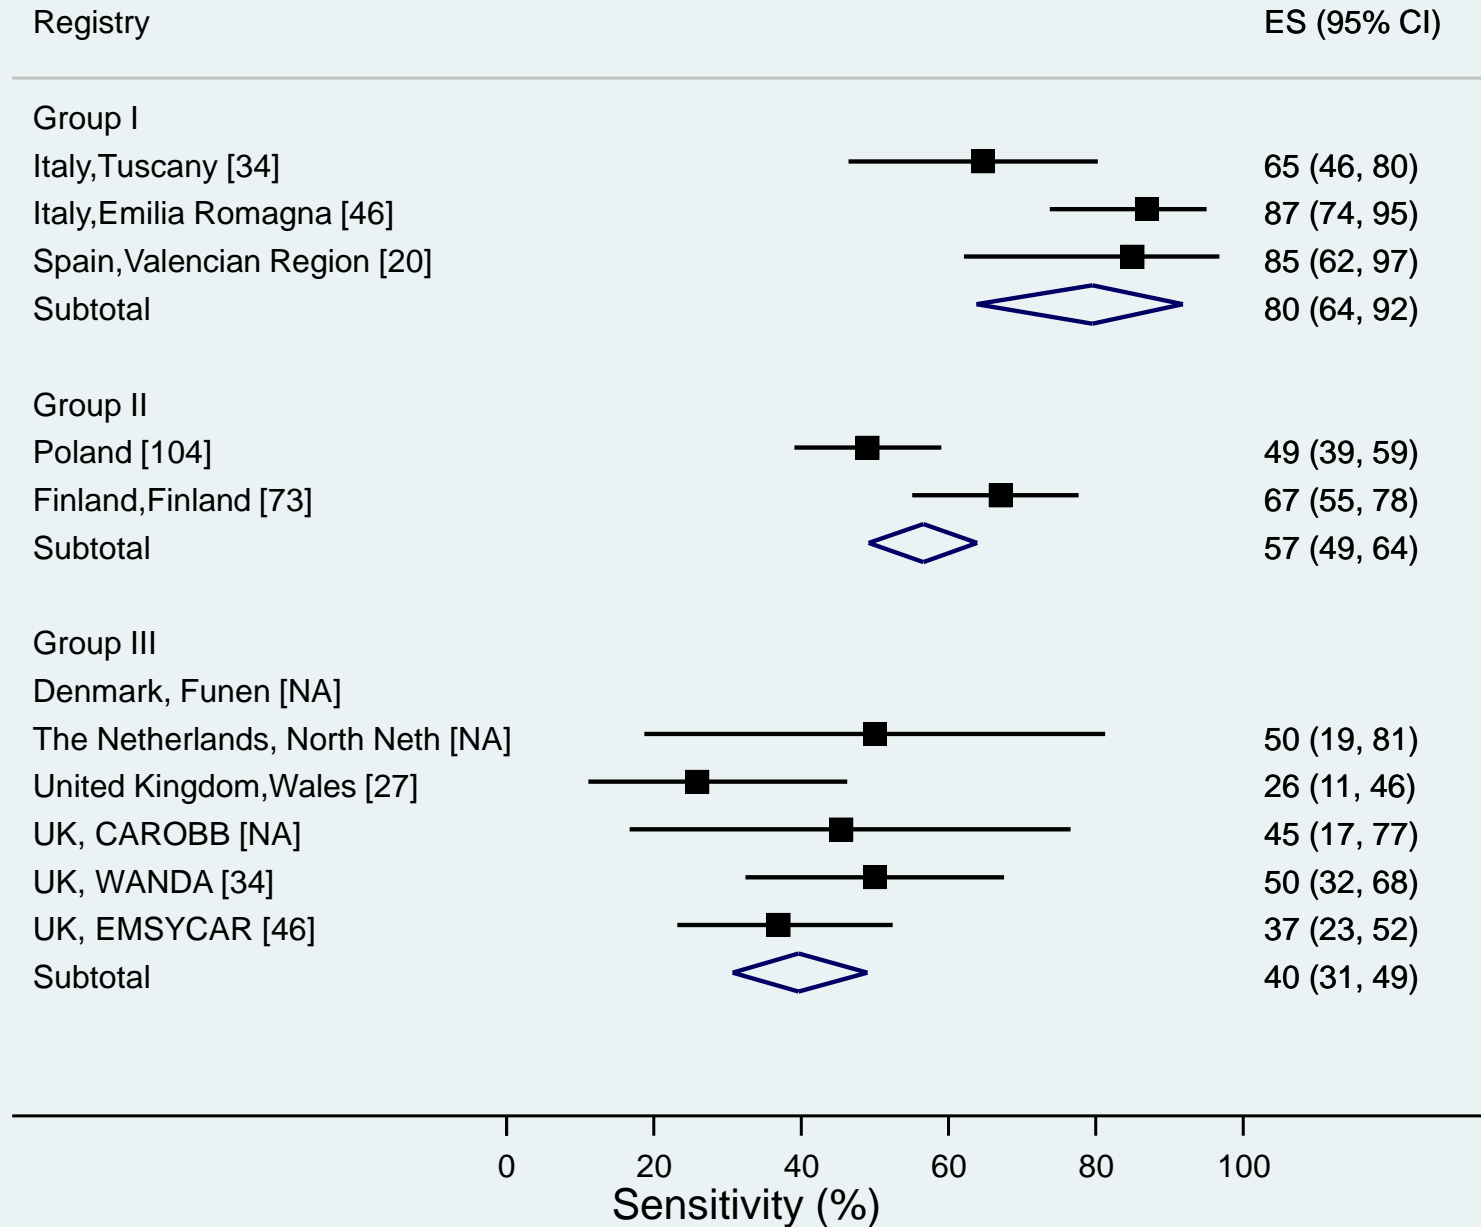

Anomalies usually diagnosed after discharge from the maternity unit

Estimates for sensitivity per registry, pooled estimates per group.

NA indicates that the number and/or the estimate cannot be reported because of release restrictions for small numbers.

CARobb: Thames Valley  
 WANDA: Wessex  
 EMSCYAR: East Midlands and South Yorkshire

# Microcephaly

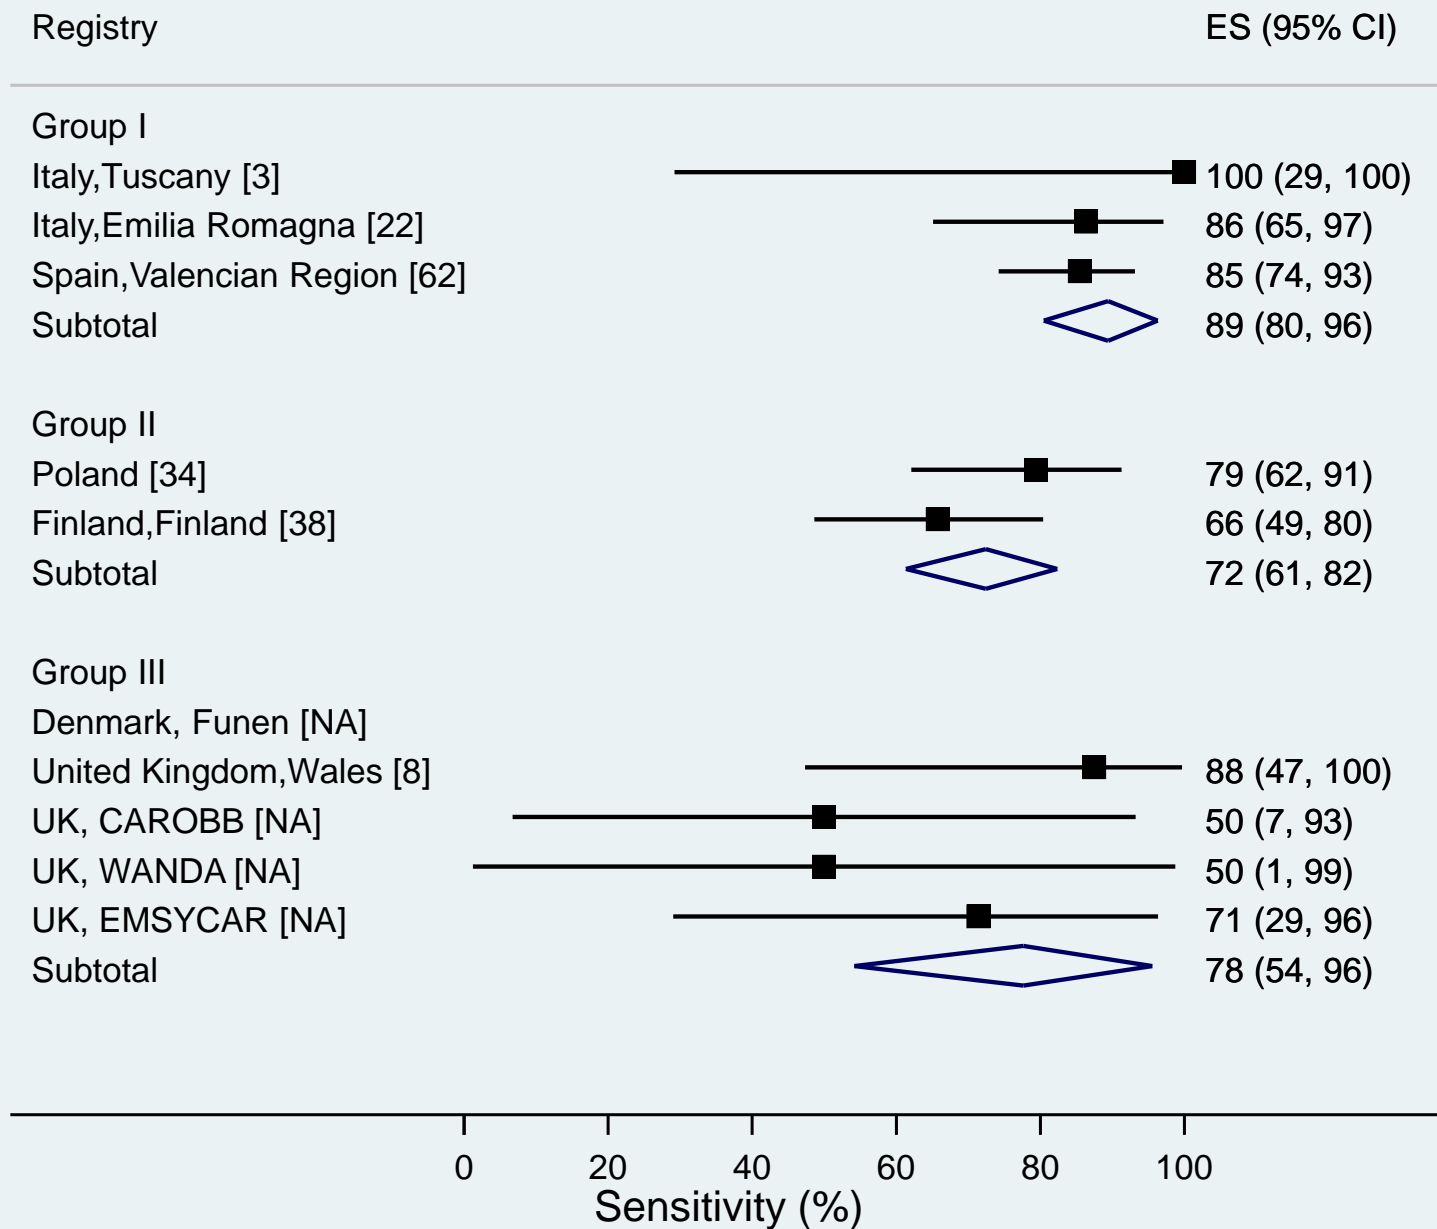

Anomalies usually diagnosed after discharge from the maternity unit

Estimates for sensitivity per registry, pooled estimates per group and overall pooled estimate.

NA indicates that the number and/or the estimate cannot be reported because of release restrictions for small numbers.

CAROB: Thames Valley  
WANDA: Wessex  
EMSCYAR: East Midlands and South Yorkshire

# VSD

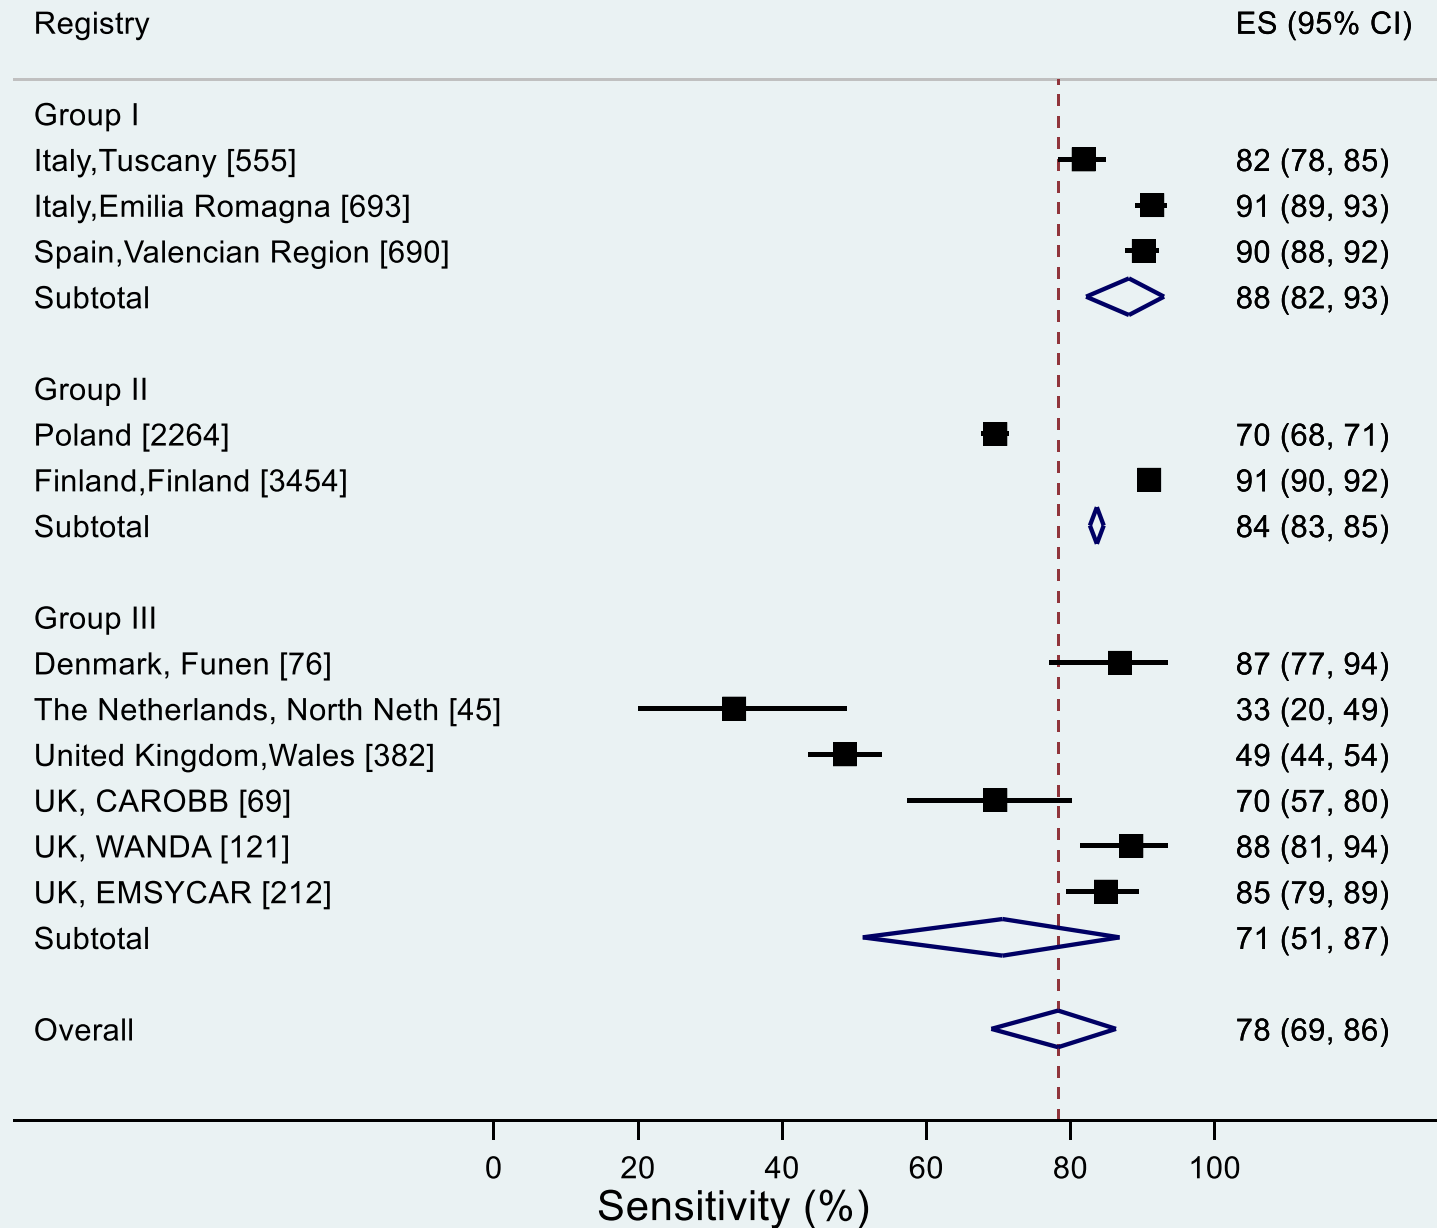

# Hirschsprung disease

Anomalies usually diagnosed after discharge from the maternity unit

Estimates for sensitivity per registry, pooled estimates per group and overall pooled estimate.

NA indicates that the number and/or the estimate cannot be reported because of release restrictions for small numbers.

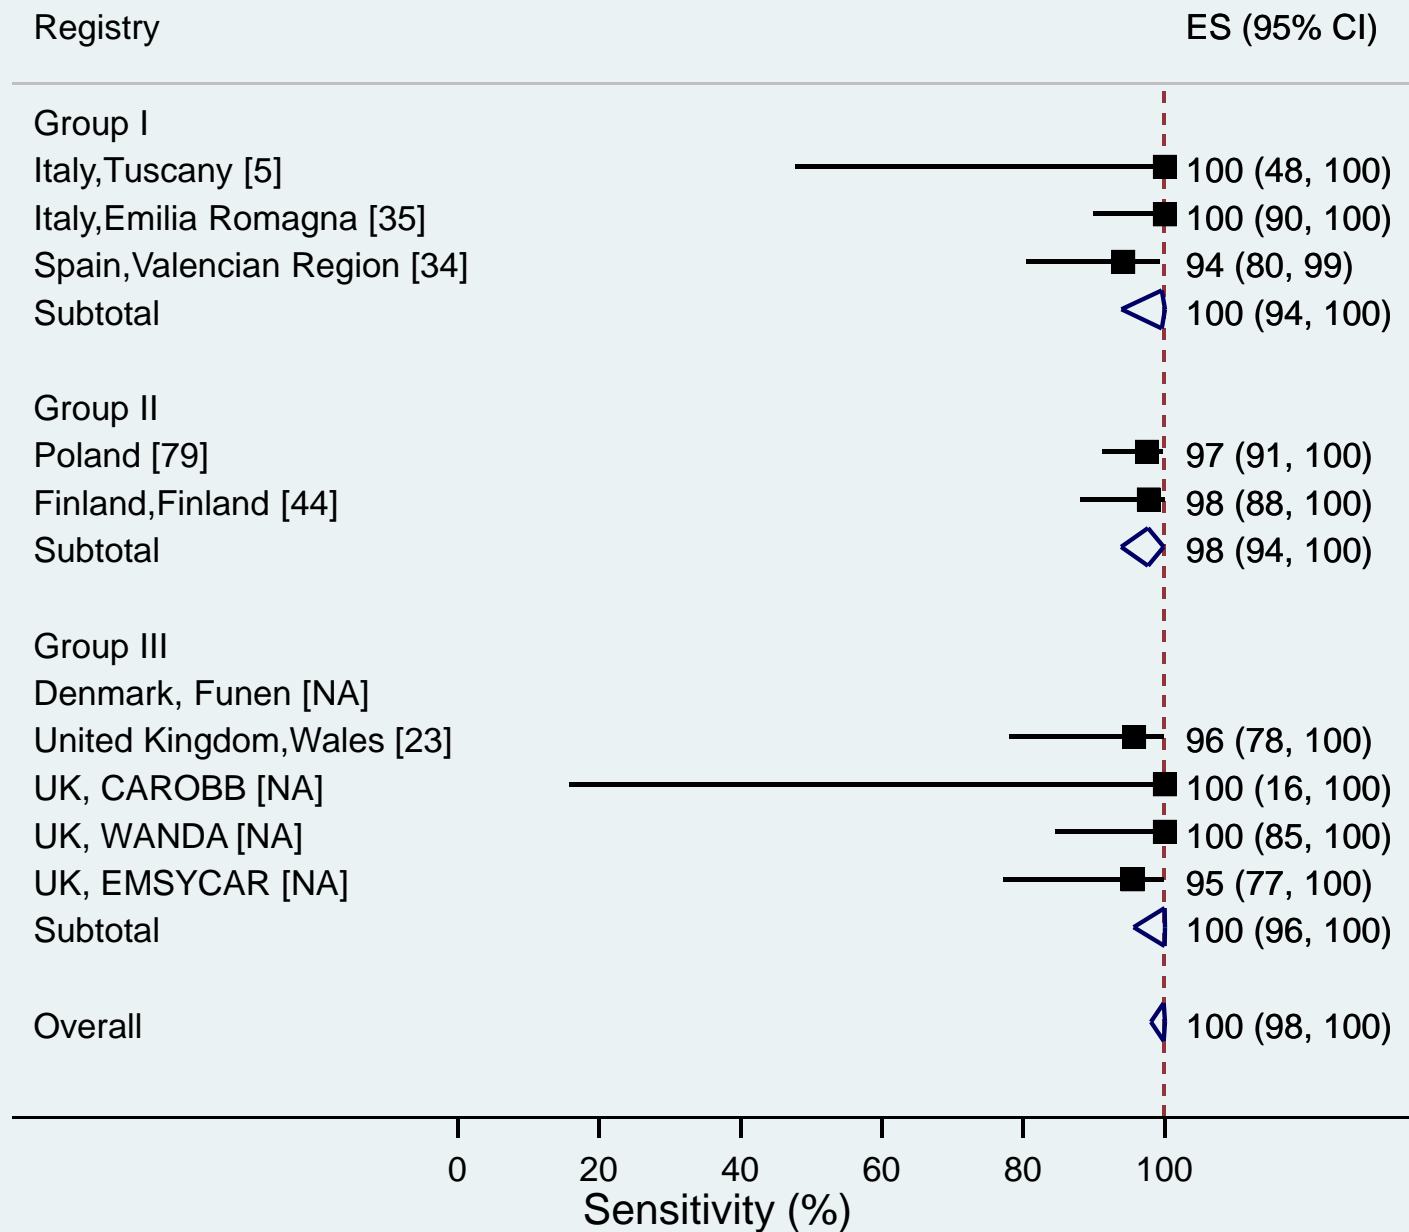

# Anomalies that present in variable form between normal and abnormal

Estimates for sensitivity per registry, pooled estimates per group and overall pooled estimate.

NA indicates that the number and/or the estimate cannot be reported because of release restrictions for small numbers.

CAROB: Thames Valley  
 WANDA: Wessex  
 EMSYAR: East Midlands and South Yorkshire

## ASD

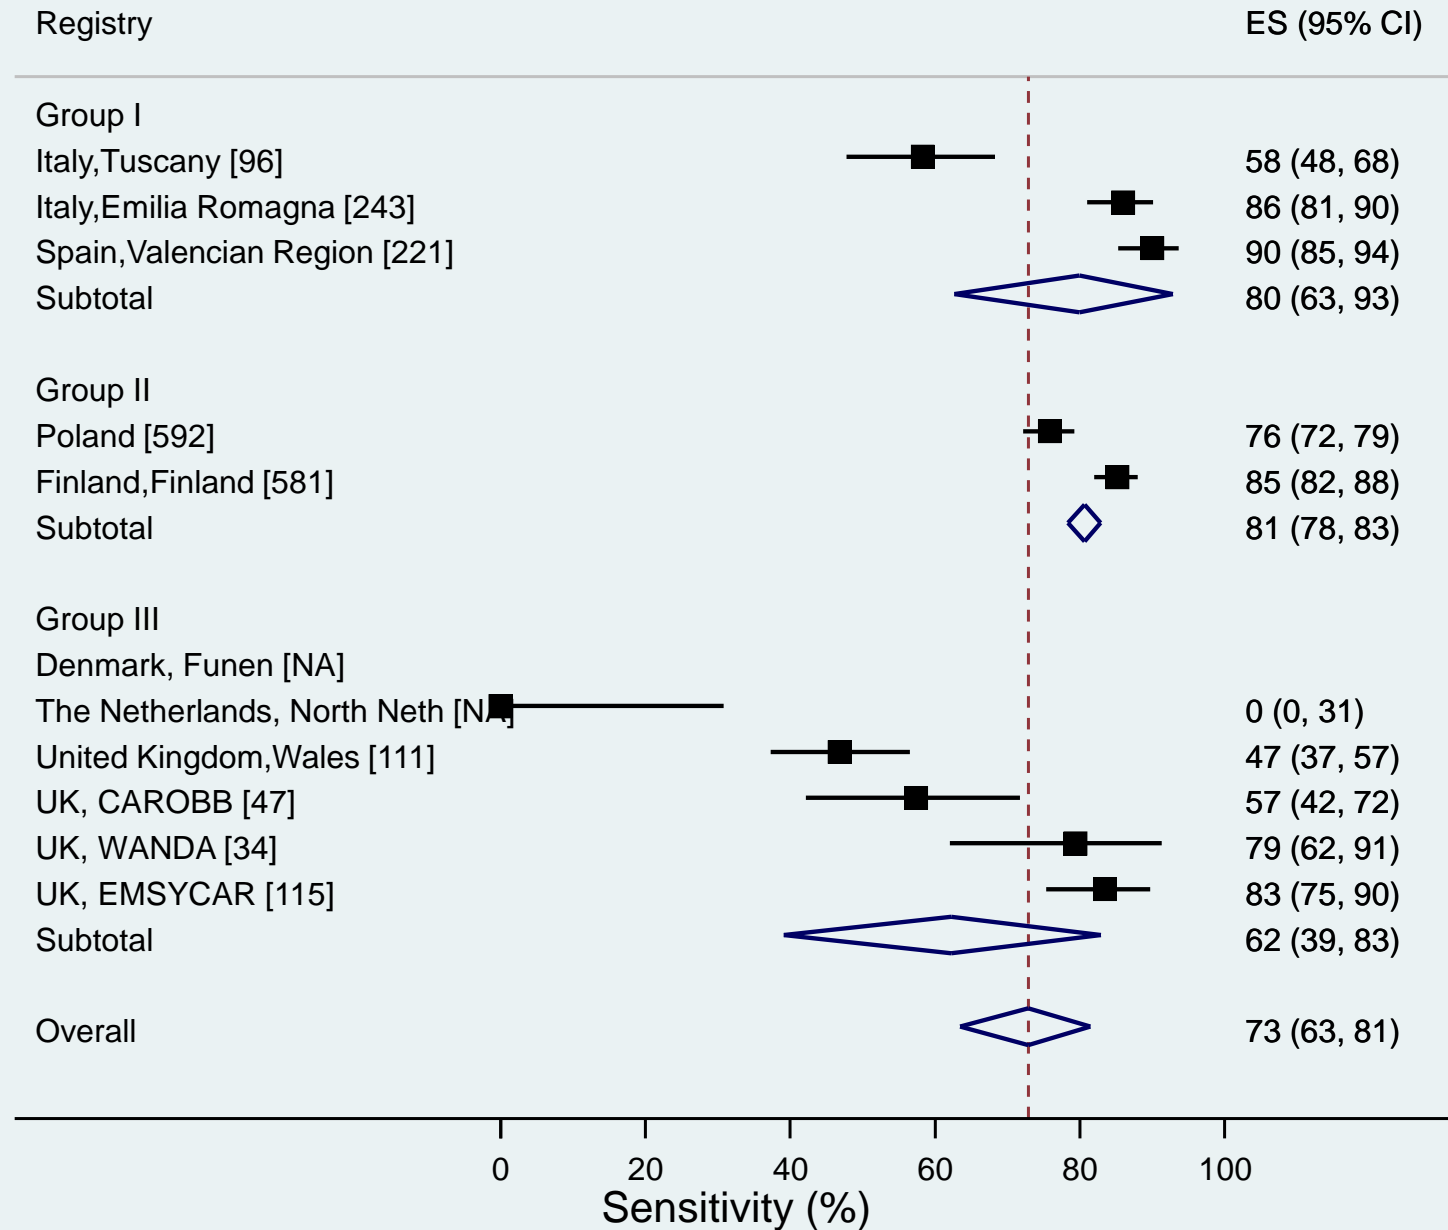

Anomalies that present in variable form between normal and abnormal

Estimates for sensitivity per registry, pooled estimates per group.

NA indicates that the number and/or the estimate cannot be reported because of release restrictions for small numbers.

CARobb: Thames Valley

WANDA: Wessex

EMSCYAR: East Midlands and South Yorkshire

# Hydronephrosis

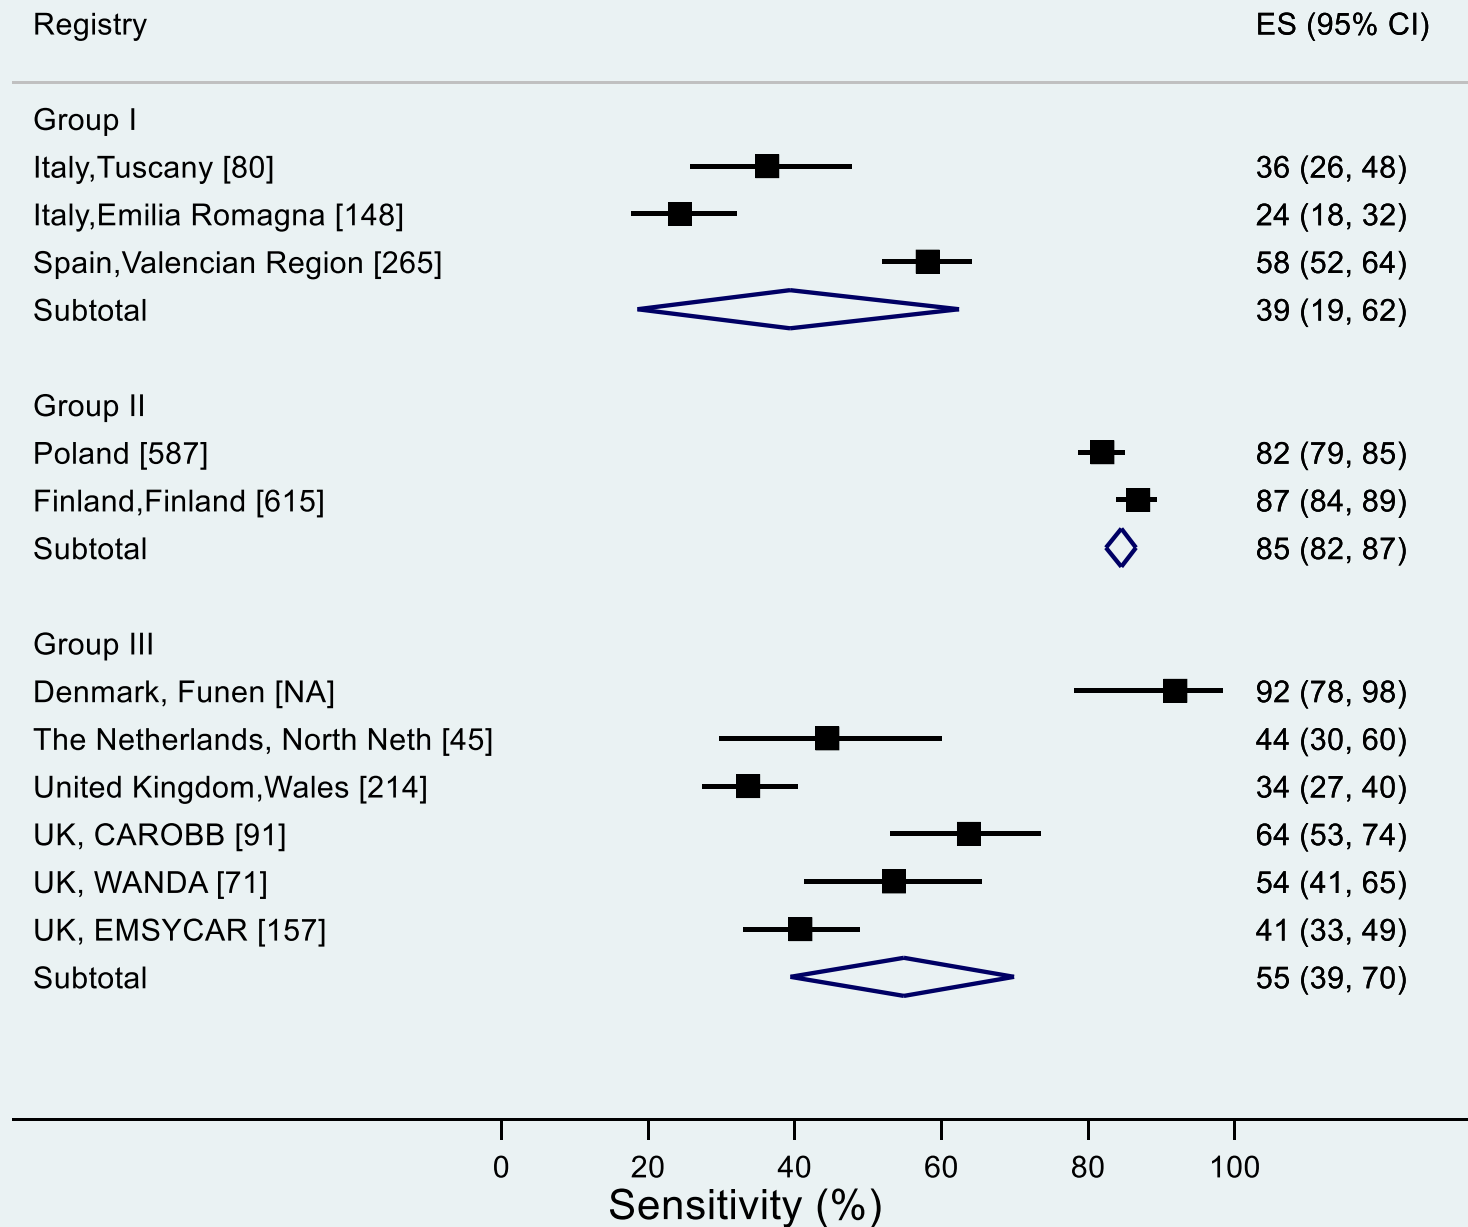

# Anomalies that present in variable form between normal and abnormal

Estimates for sensitivity per registry, pooled estimates per group and overall pooled estimate.

NA indicates that the number and/or the estimate cannot be reported because of release restrictions for small numbers.

CAROBB: Thames Valley  
 WANDA: Wessex  
 EMSYCAR: East Midlands and South Yorkshire

# Hypospadias

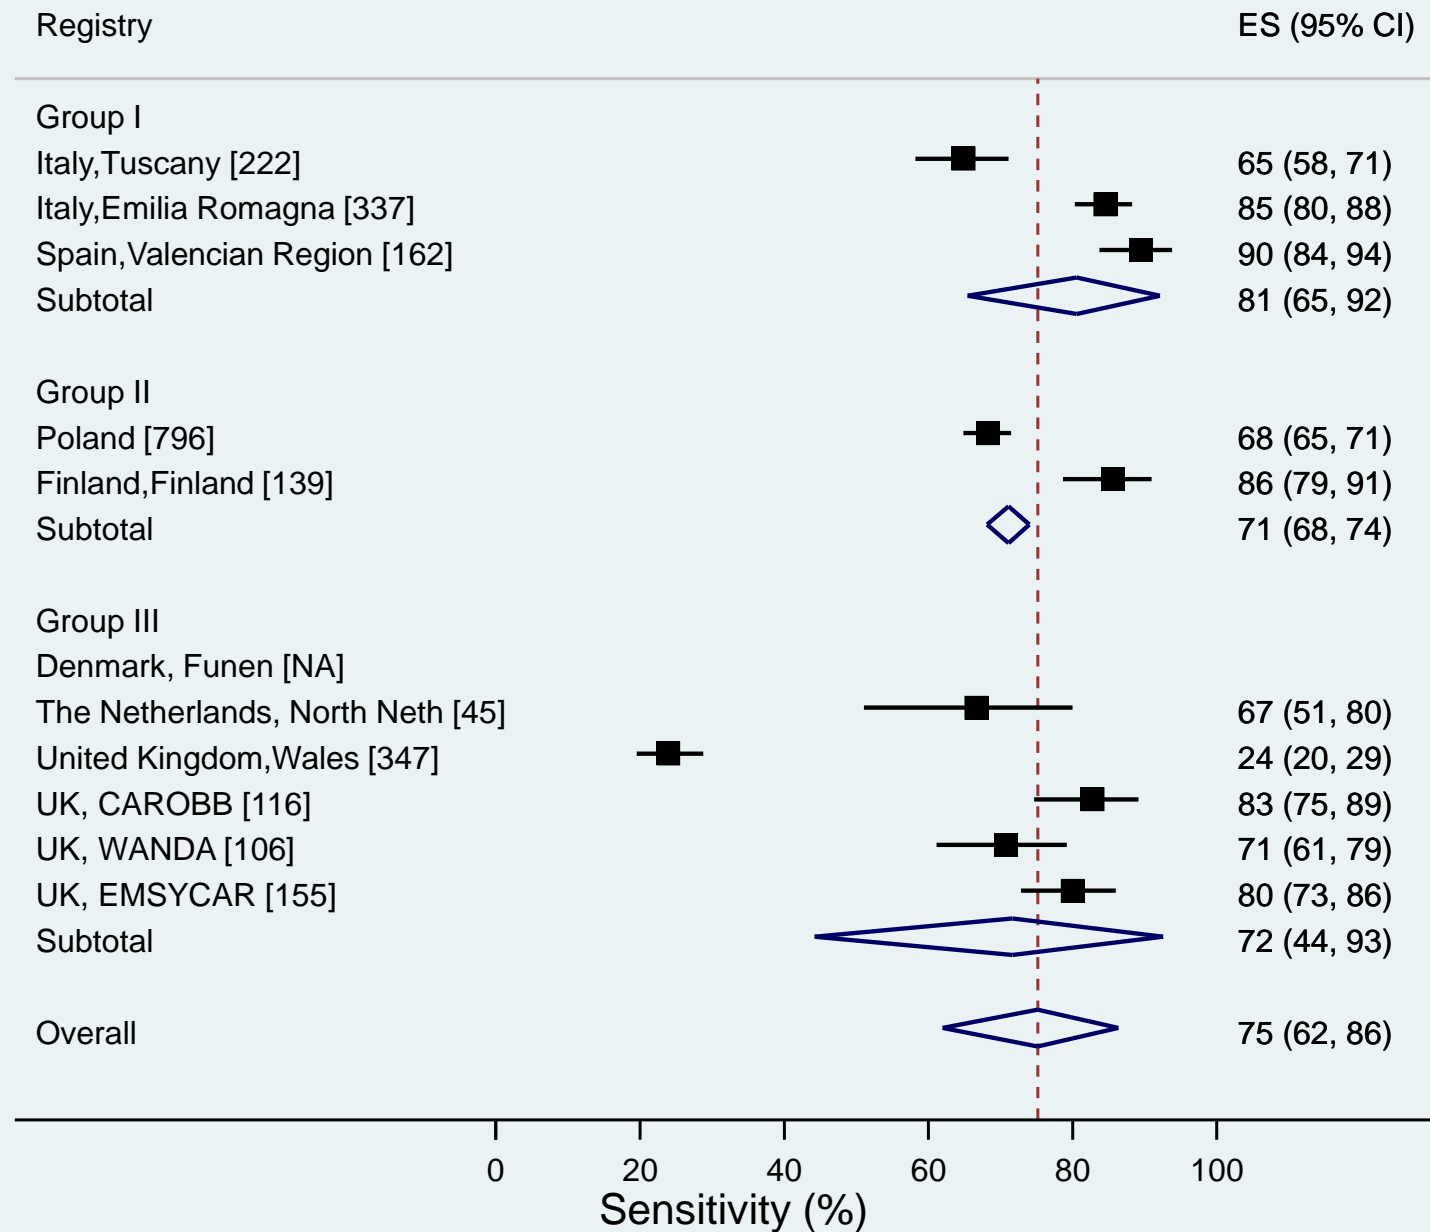

## Chromosomal anomaly

NA indicates that the number and/or the estimate cannot be reported because of release restrictions for small numbers.

Estimates for sensitivity per registry, pooled estimates per group and overall pooled estimate.

CAROB: Thames Valley

WANDA: Wessex

EMSCYAR: East Midlands and South Yorkshire

## Down syndrome

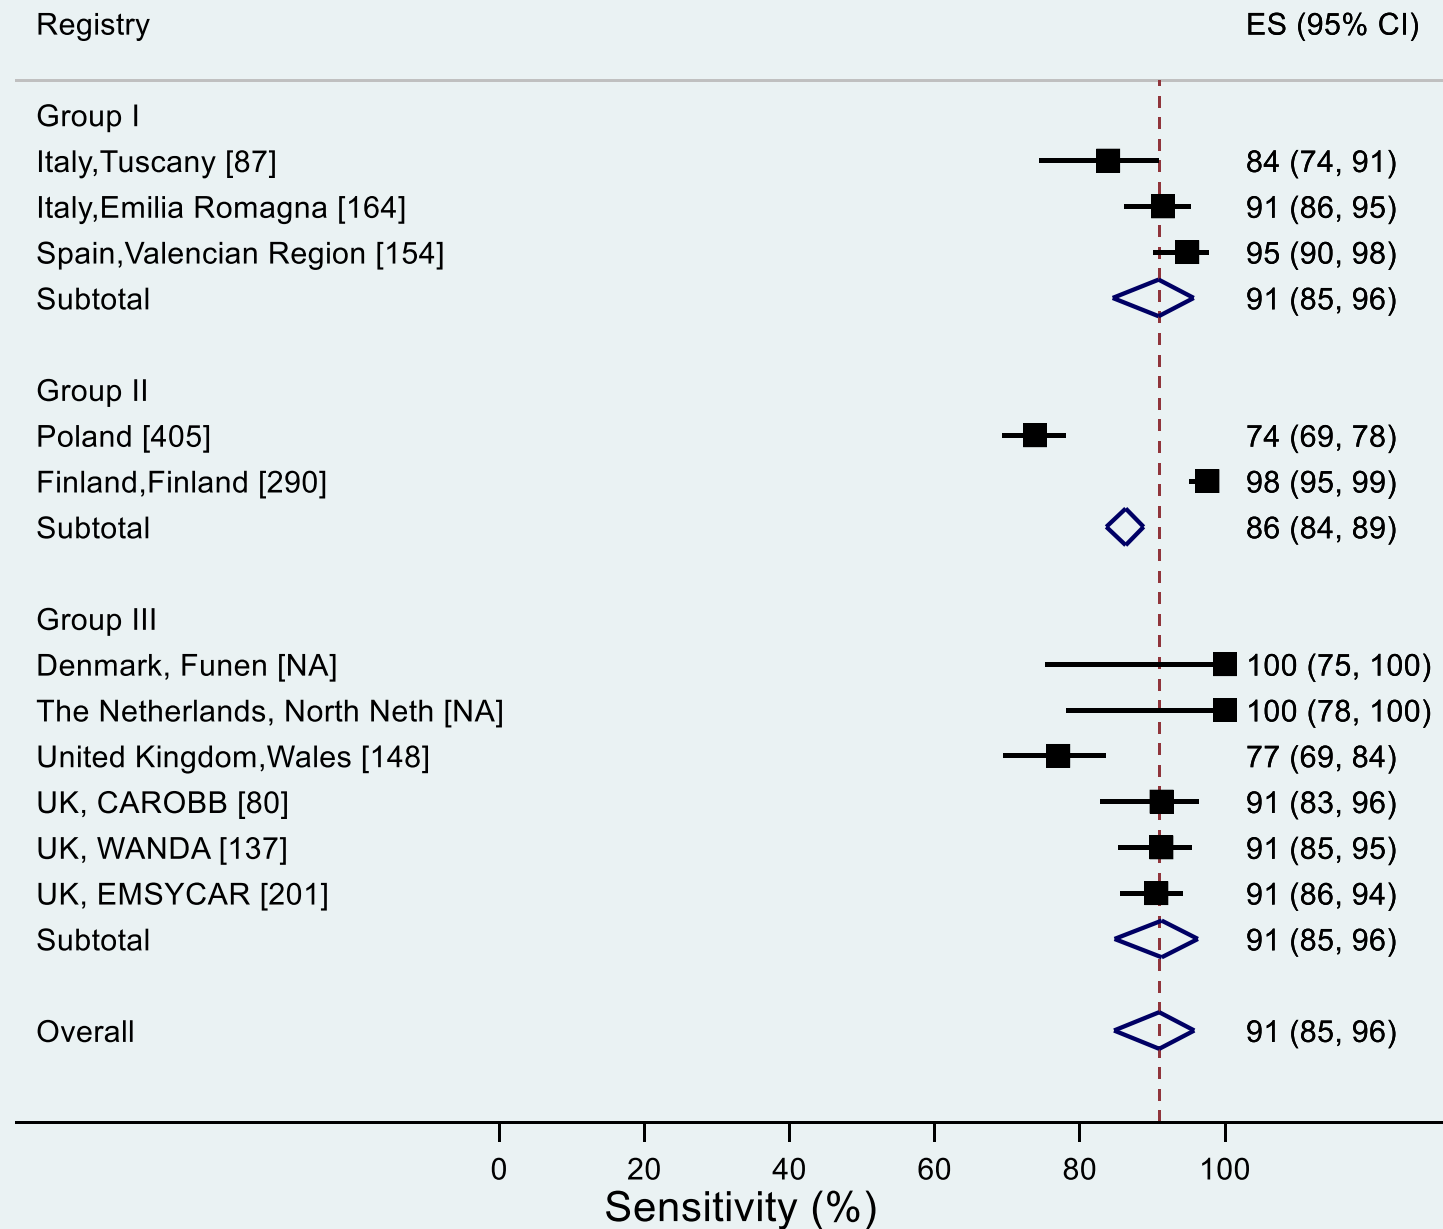



## Mild anomaly

NA indicates that the number and/or the estimate cannot be reported because of release restrictions for small numbers.

Estimates for sensitivity per registry, pooled estimates per group and overall pooled estimate.

CAROBB: Thames Valley

WANDA: Wessex

EMSCYAR: East Midlands and South Yorkshire

## Polydactyly

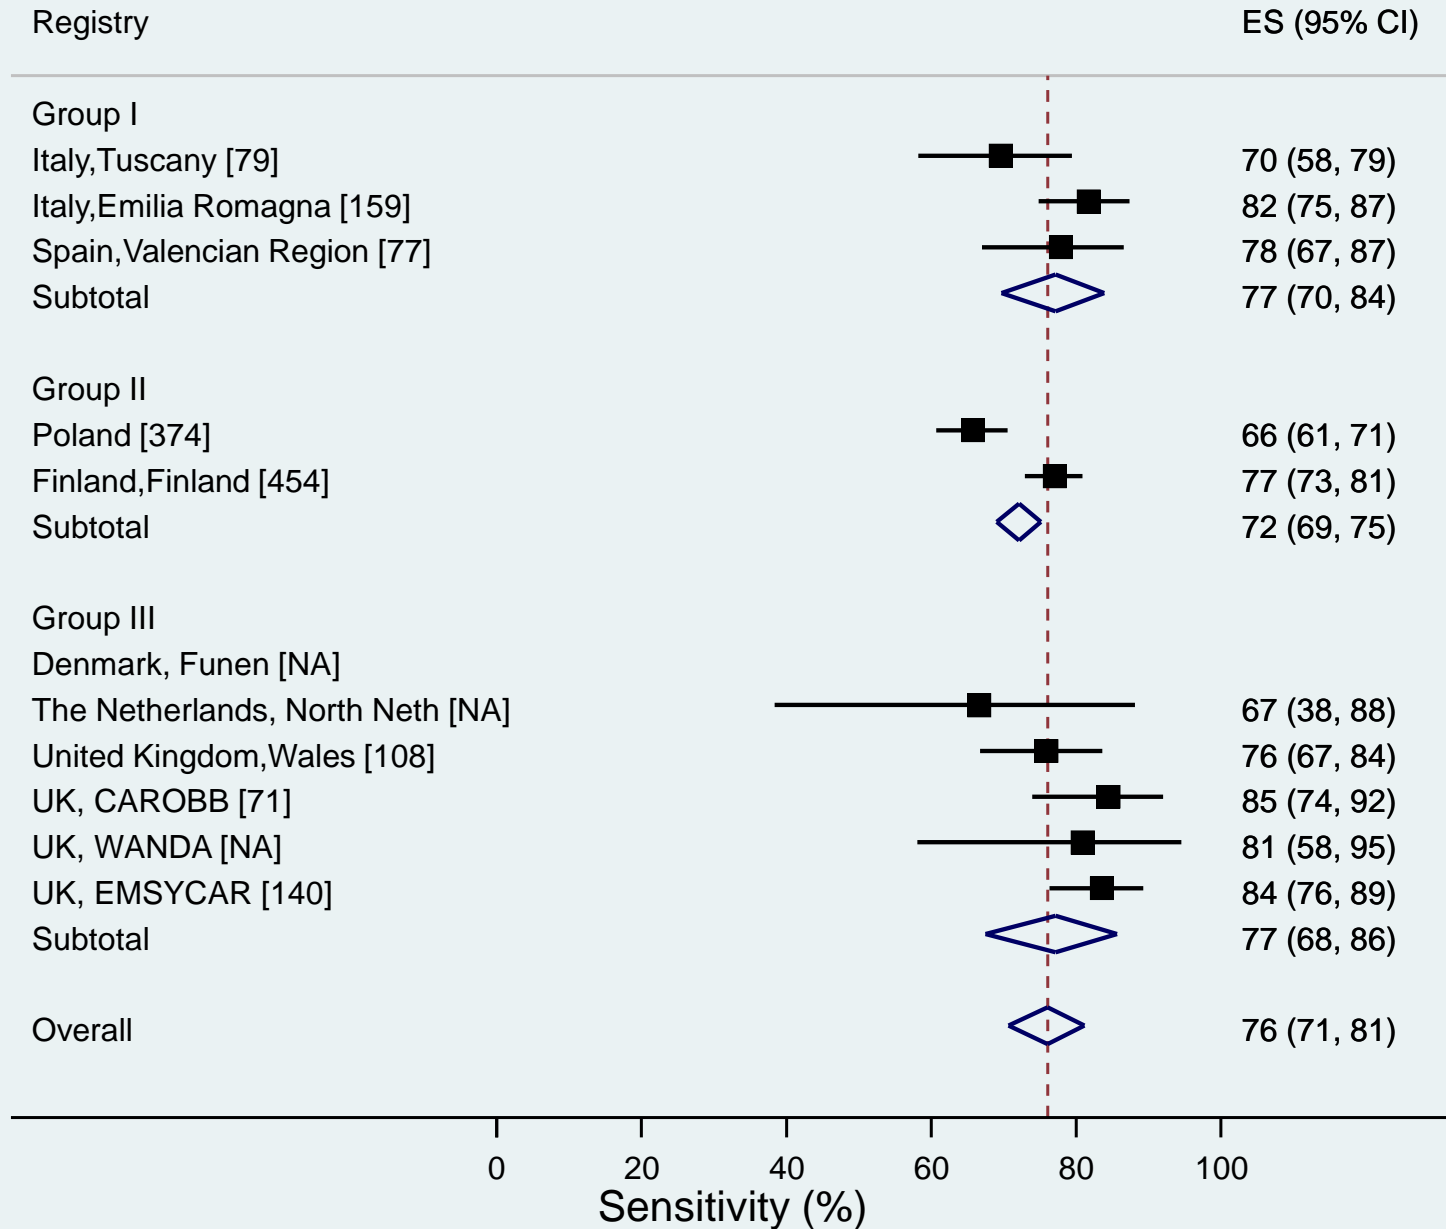

Supplement: MOESM2 [file 10654_2023_971_MOESM2_ESM.pdf]
