# Supplementary material for: Accuracy of congenital anomaly coding in live birth children recorded in European health care databases, a EUROlinkCAT study
Source: Springer Nature journal article supplement (doi:10.1007/s10654-023-00971-z), 2023-02-18

# Anomalies detectable at birth

Estimates for PPV per registry, pooled estimates per group.

NA indicates that the number and/or the estimate cannot be reported because of release restrictions for small numbers.

## Spina bifida

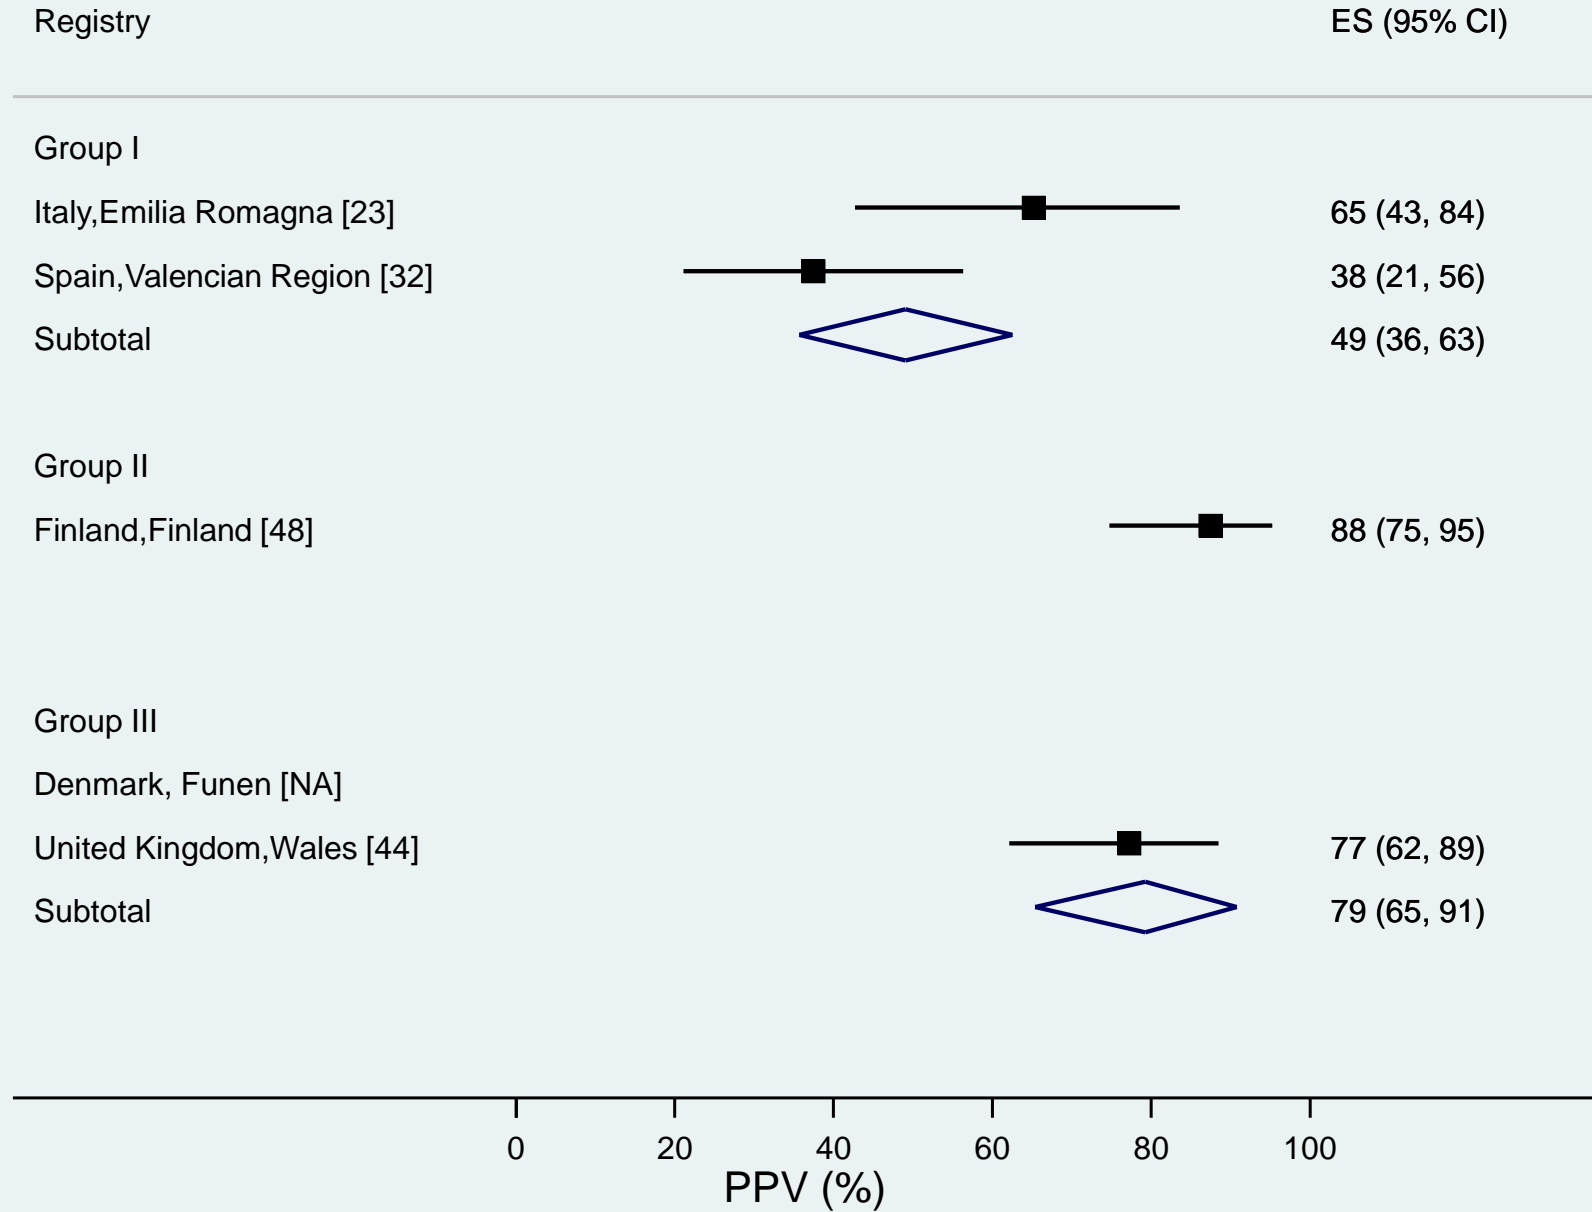

## Anomalies detectable at birth

Estimates for PPV per registry, pooled estimates per group.

NA indicates that the number and/or the estimate cannot be reported because of release restrictions for small numbers.

## Cleft lip with or without cleft palate

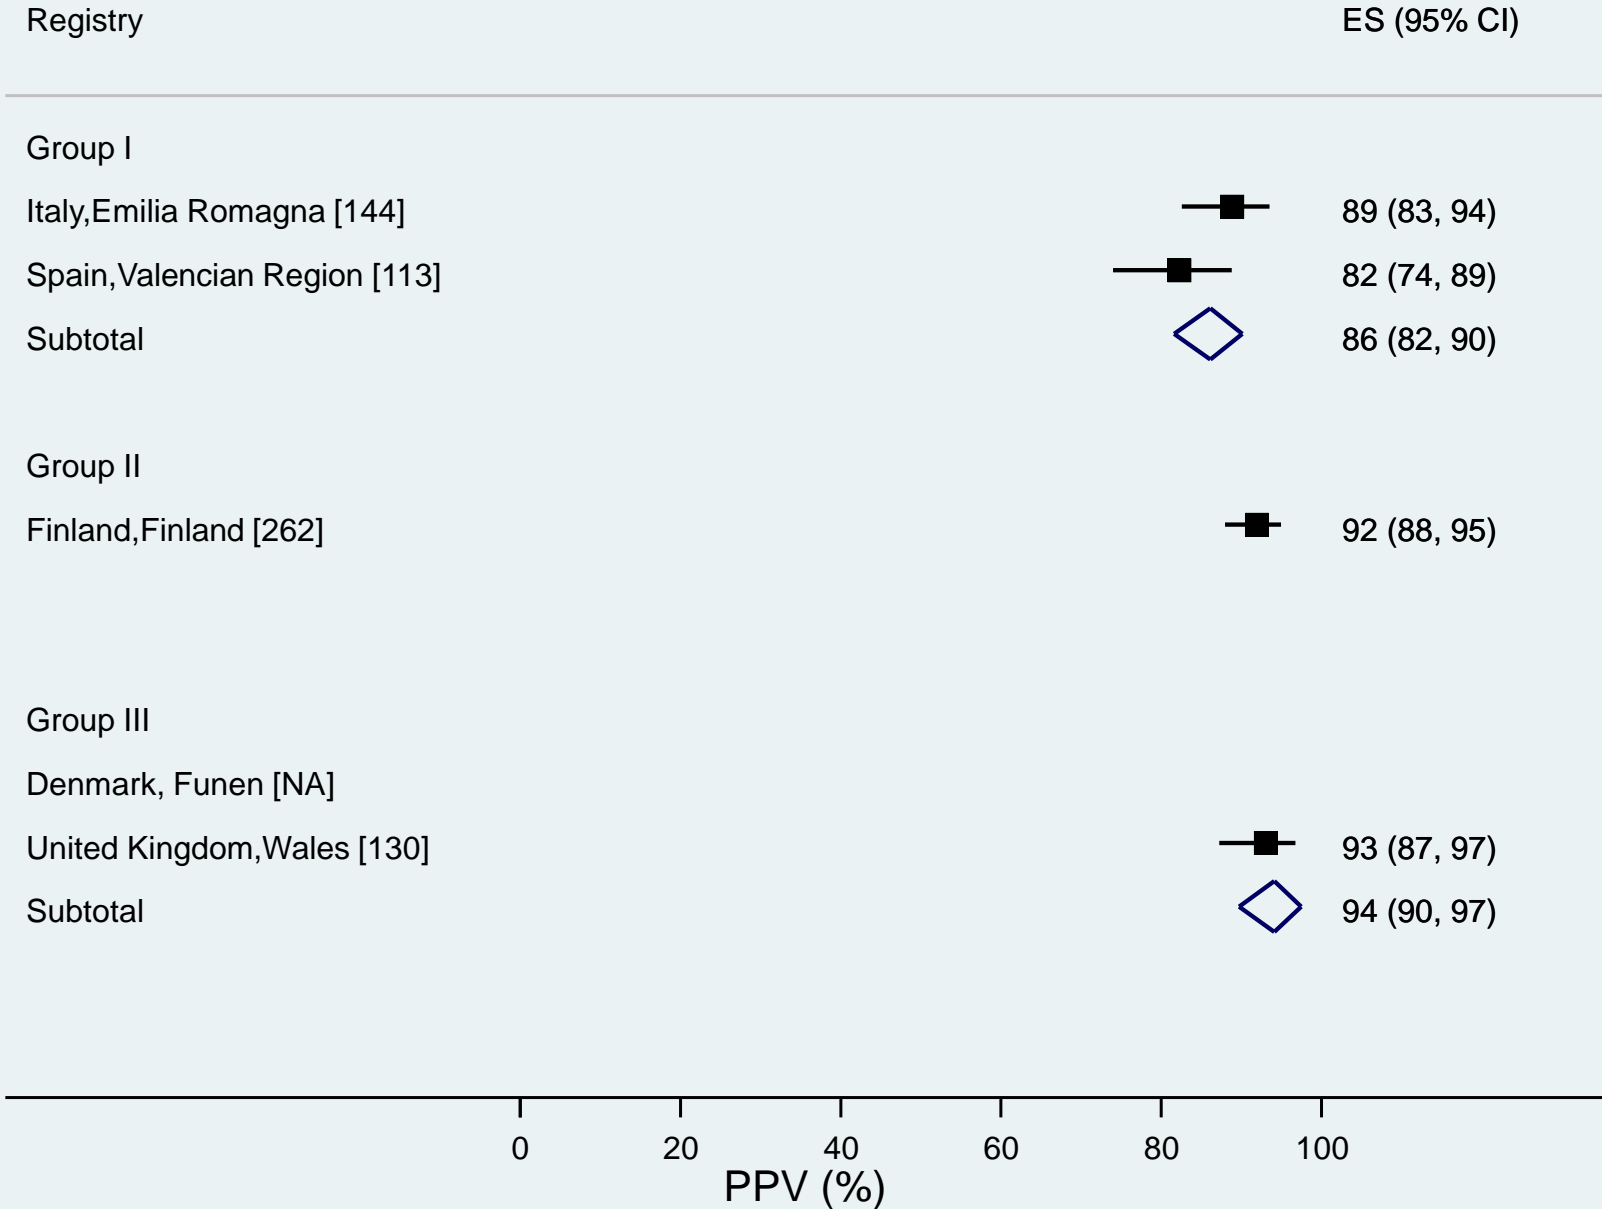

## Anomalies detectable at birth

Estimates for PPV per registry, pooled estimates per group.

NA indicates that the number and/or the estimate cannot be reported because of release restrictions for small numbers.

## Cleft palate

Registry ES (95% CI)

### Group I

Italy, Emilia Romagna [116] 68 (59, 76)

Spain, Valencian Region [79] 58 (47, 69)

Subtotal 64 (57, 71)

### Group II

Finland, Finland [333] 93 (90, 96)

### Group III

Denmark, Funen [NA] 71 (44, 90)

United Kingdom, Wales [105] 87 (79, 93)

Subtotal 85 (78, 91)

0 20 40 60 80 100

PPV (%)

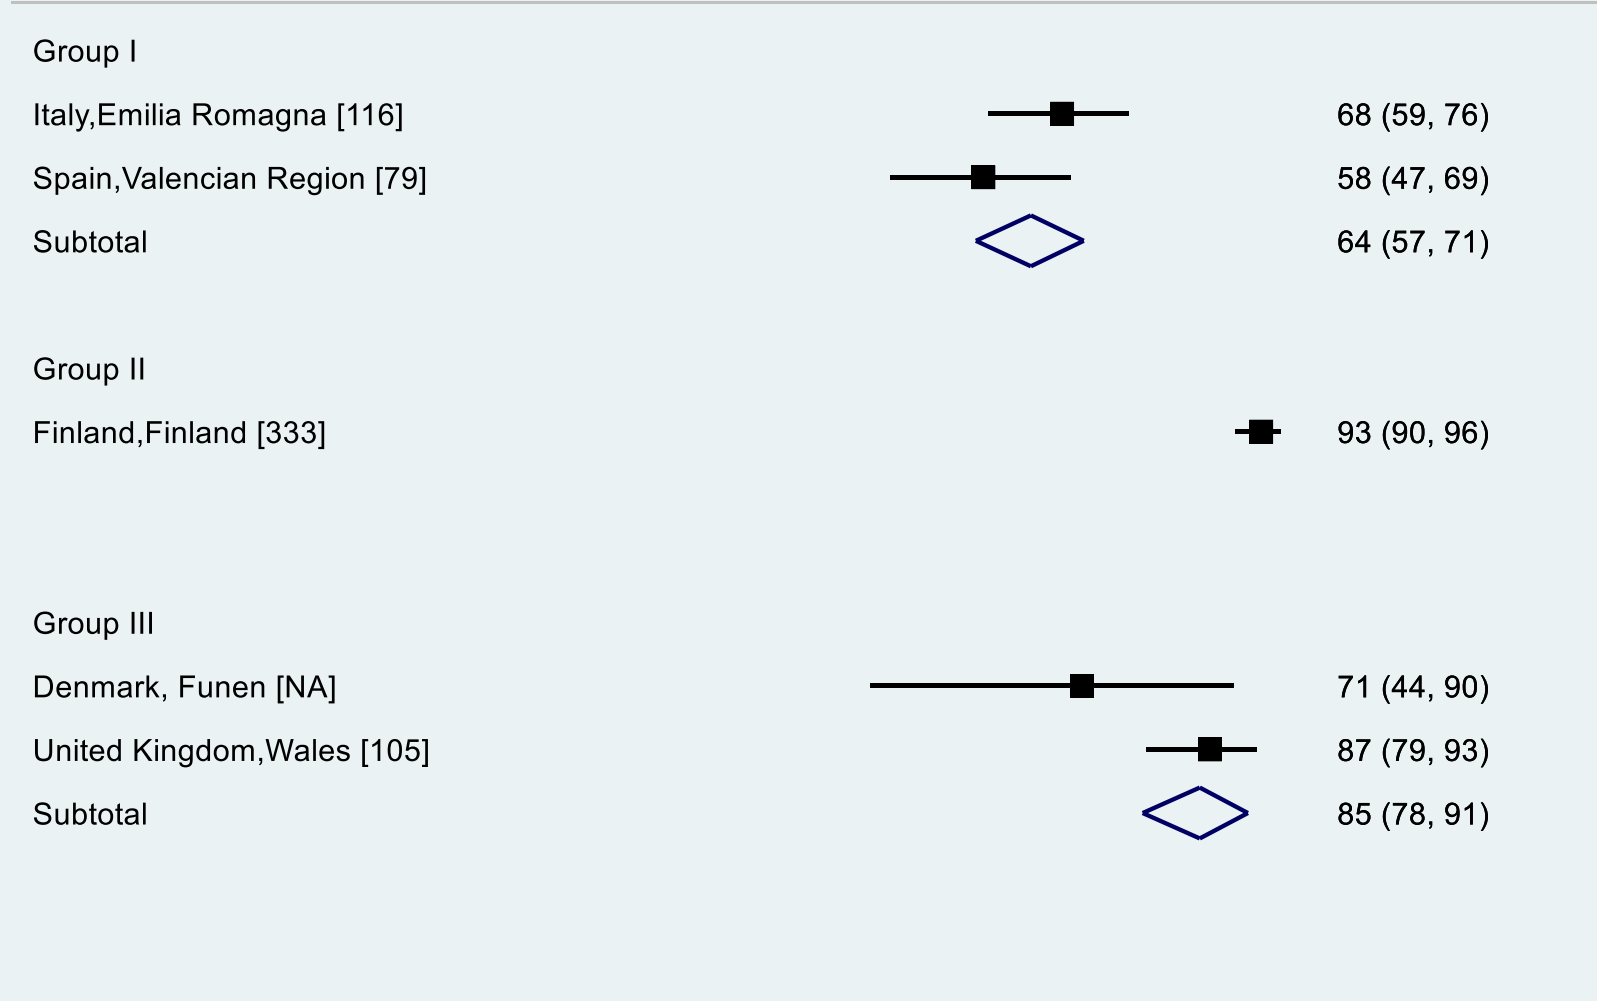

# Anomalies detectable at birth

Estimates for PPV per registry, pooled estimates per group and overall pooled estimate.

NA indicates that the number and/or the estimate cannot be reported because of release restrictions for small numbers.

# Gastroschisis

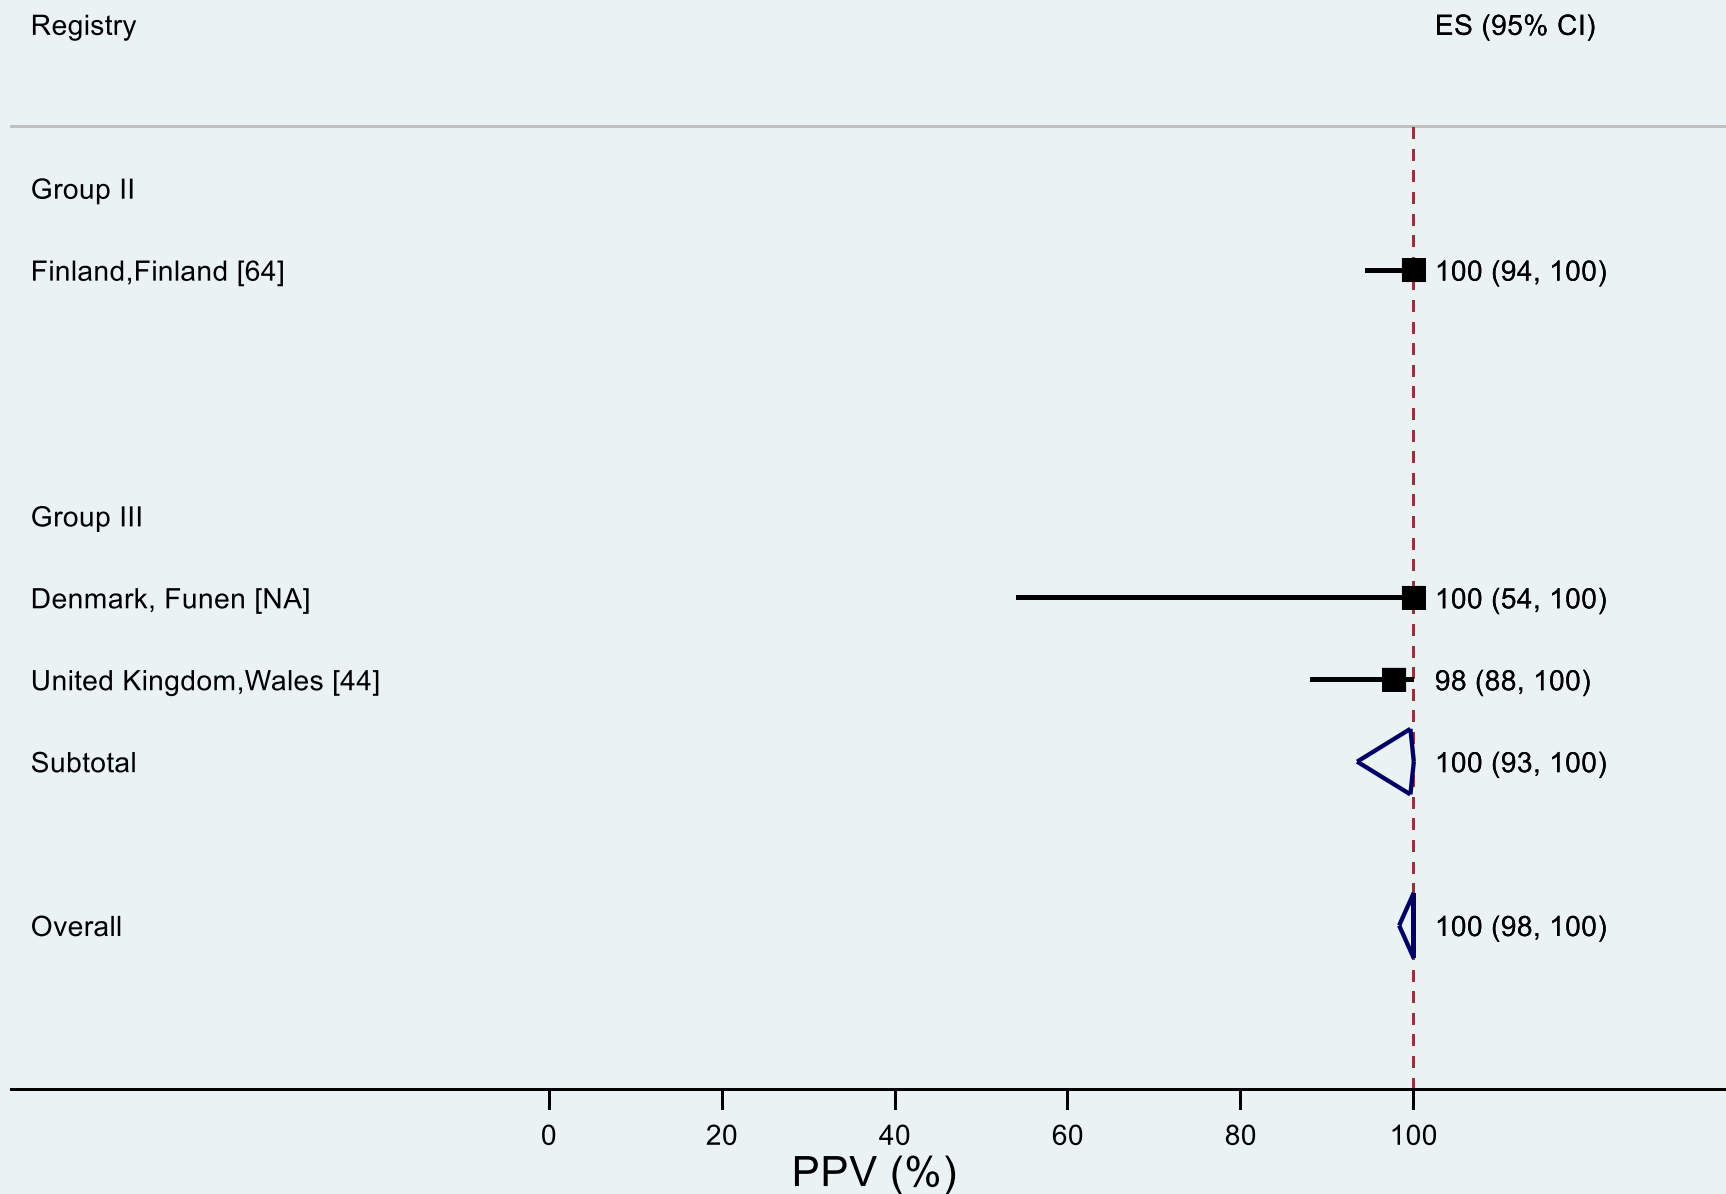

# Anomalies detectable at birth

Estimates for PPV per registry, pooled estimates per group.

NA indicates that the number and/or the estimate cannot be reported because of release restrictions for small numbers.

# Omphalocele

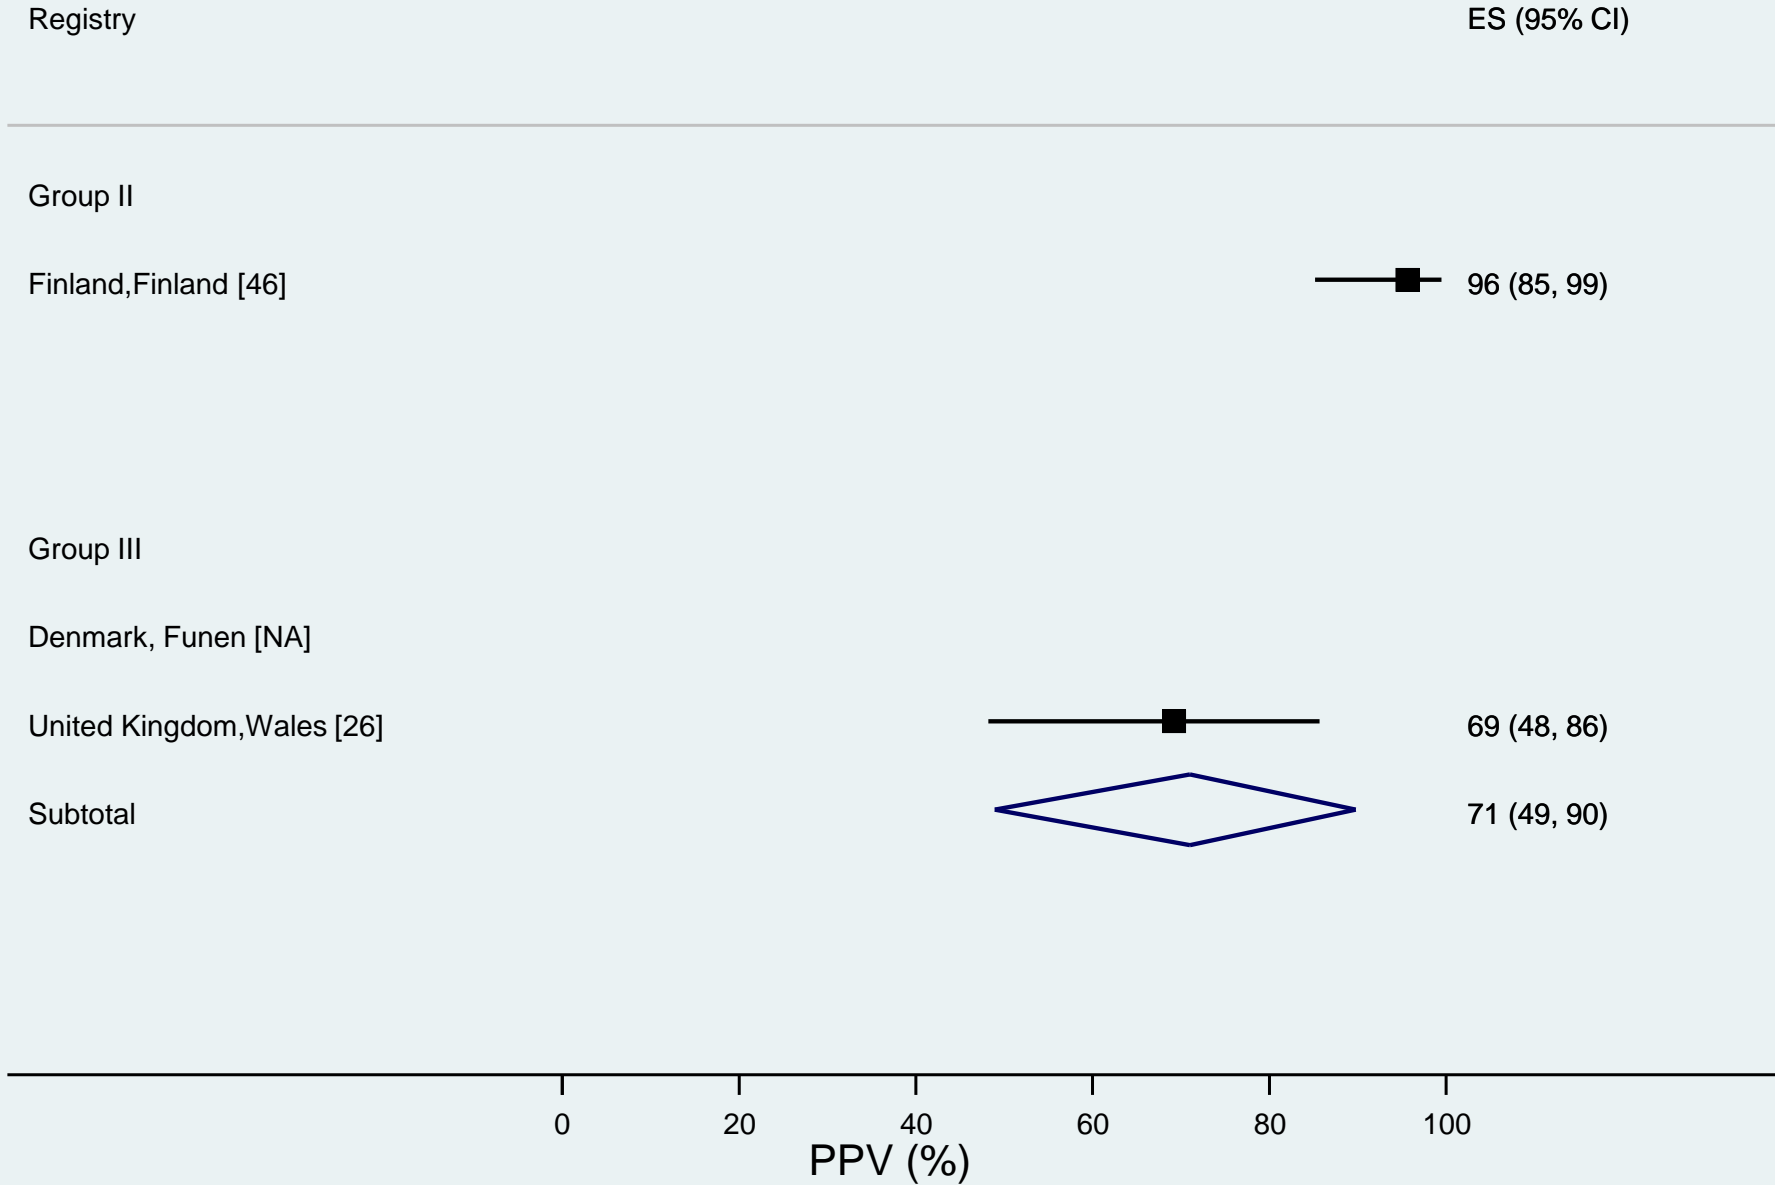

# Anomalies detectable at birth

Estimates for PPV per registry, pooled estimates per group.

NA indicates that the number and/or the estimate cannot be reported because of release restrictions for small numbers.

# Clubfoot

Registry ES (95% CI)

---

## Group I

Italy, Emilia Romagna [119] 82 (73, 88)

Spain, Valencian Region [75] 84 (74, 91)

Subtotal 83 (77, 88)

## Group II

Finland, Finland [386] 99 (97, 100)

## Group III

Denmark, Funen [NA] 100 (87, 100)

United Kingdom, Wales [102] 75 (65, 83)

Subtotal 83 (75, 89)

0 20 40 60 80 100

PPV (%)

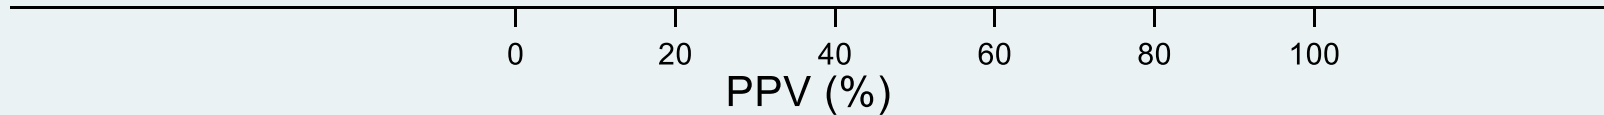

# Anomalies with high prenatal detection rate

Estimates for PPV per registry, pooled estimates per group and overall pooled estimate.

NA indicates that the number and/or the estimate cannot be reported because of release restrictions for small numbers.

## Hypoplastic left heart syndrome

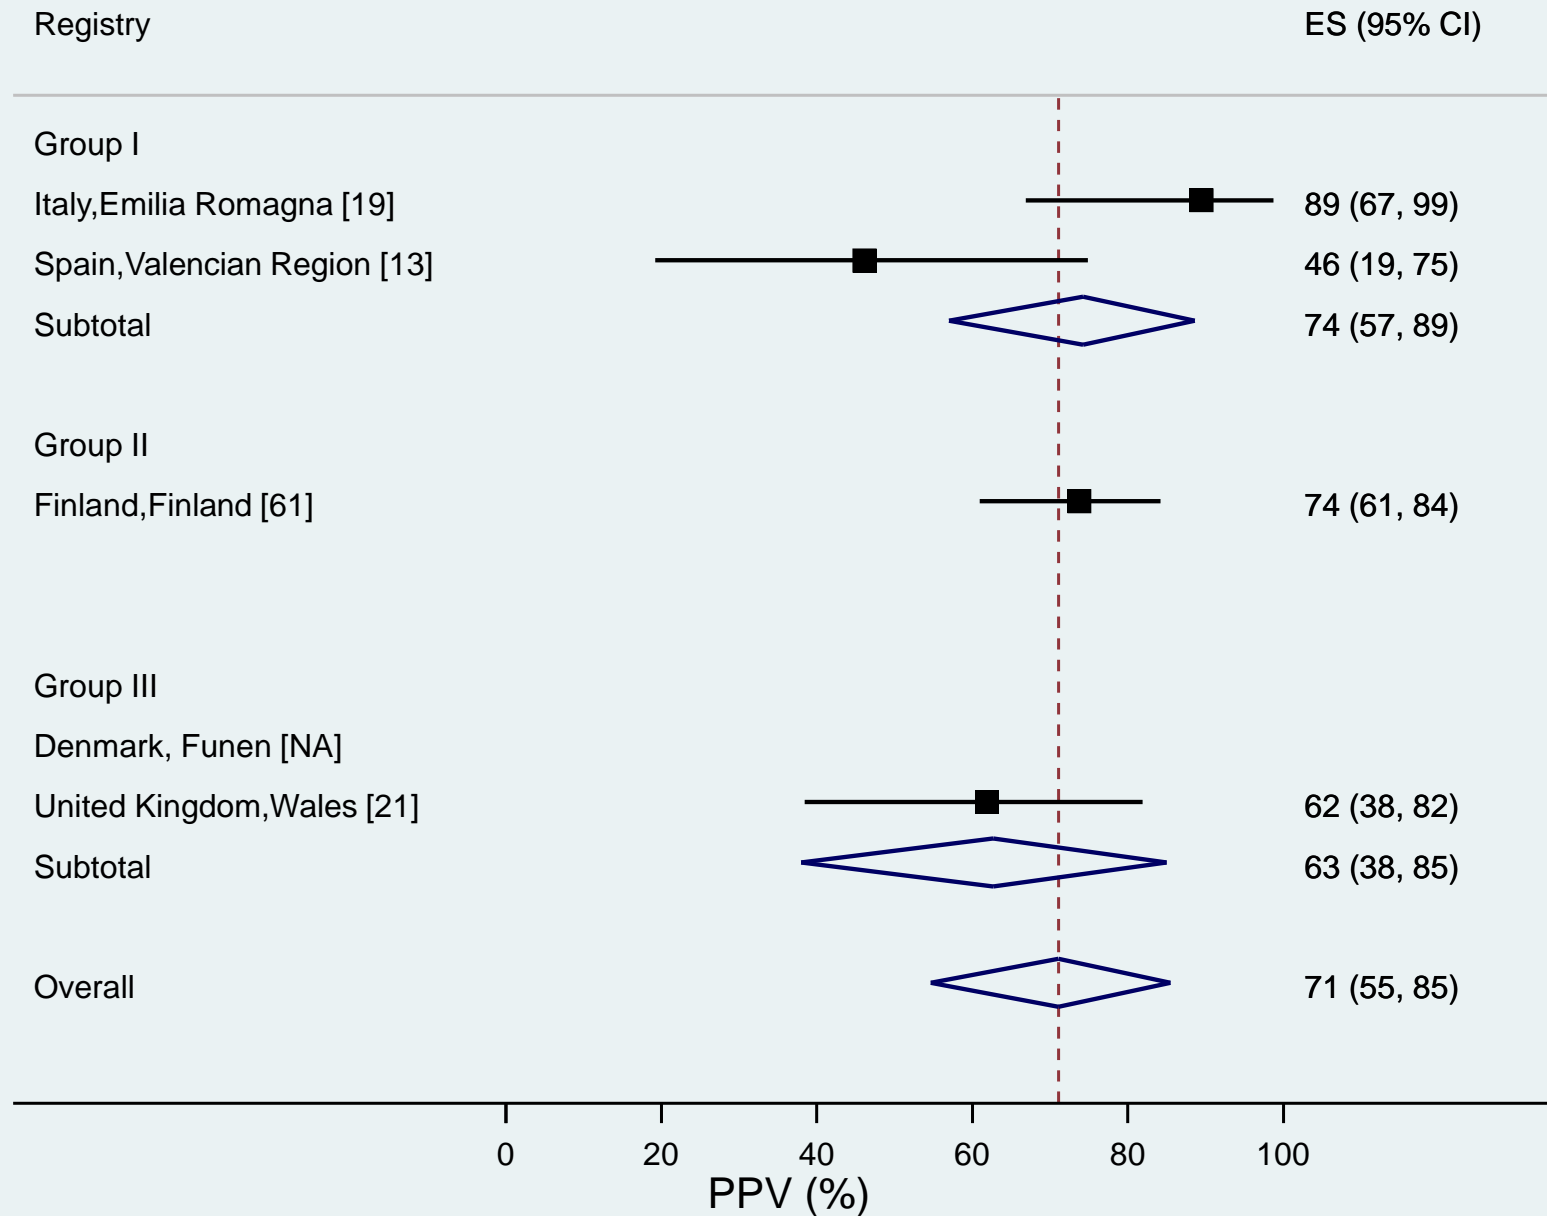

# Anomalies with high prenatal detection rate

Estimates for PPV per registry, pooled estimates per group.

NA indicates that the number and/or the estimate cannot be reported because of release restrictions for small numbers.

# Unilateral renal agenesis

Registry

ES (95% CI)

Group I

Italy, Emilia Romagna [97]

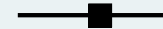

63 (52, 72)

Spain, Valencian Region [69]

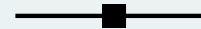

55 (43, 67)

Subtotal

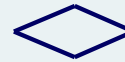

60 (52, 67)

Group II

Finland, Finland [69]

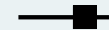

94 (86, 98)

Group III

Denmark, Funen [NA]

(Excluded)

United Kingdom, Wales [39]

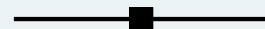

46 (30, 63)

0 20 40 60 80 100

PPV (%)



## Anomalies with high prenatal detection rate

Estimates for PPV per registry, pooled estimates per group and overall pooled estimate.

NA indicates that the number and/or the estimate cannot be reported because of release restrictions for small numbers.

## Limb reduction defects

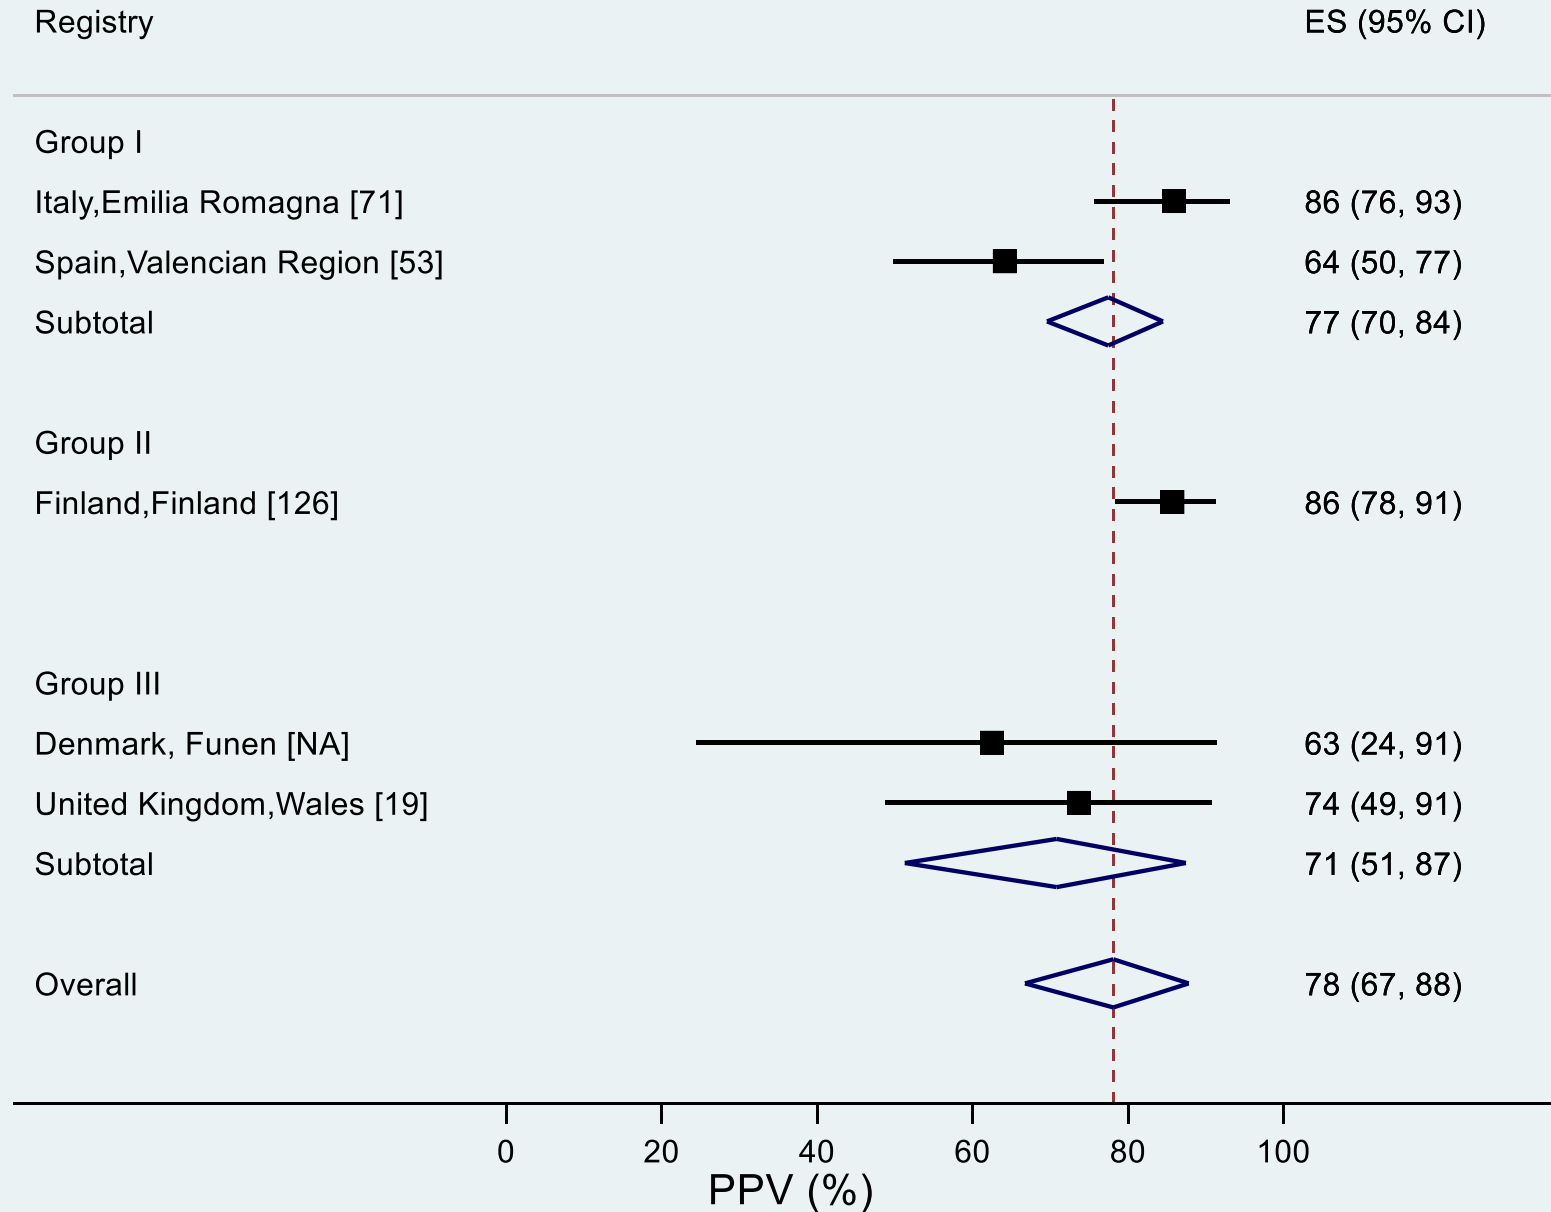

Anomalies usually diagnosed after discharge from the maternity unit

Estimates for PPV per registry, pooled estimates per group.

NA indicates that the number and/or the estimate cannot be reported because of release restrictions for small numbers.

# Microcephaly

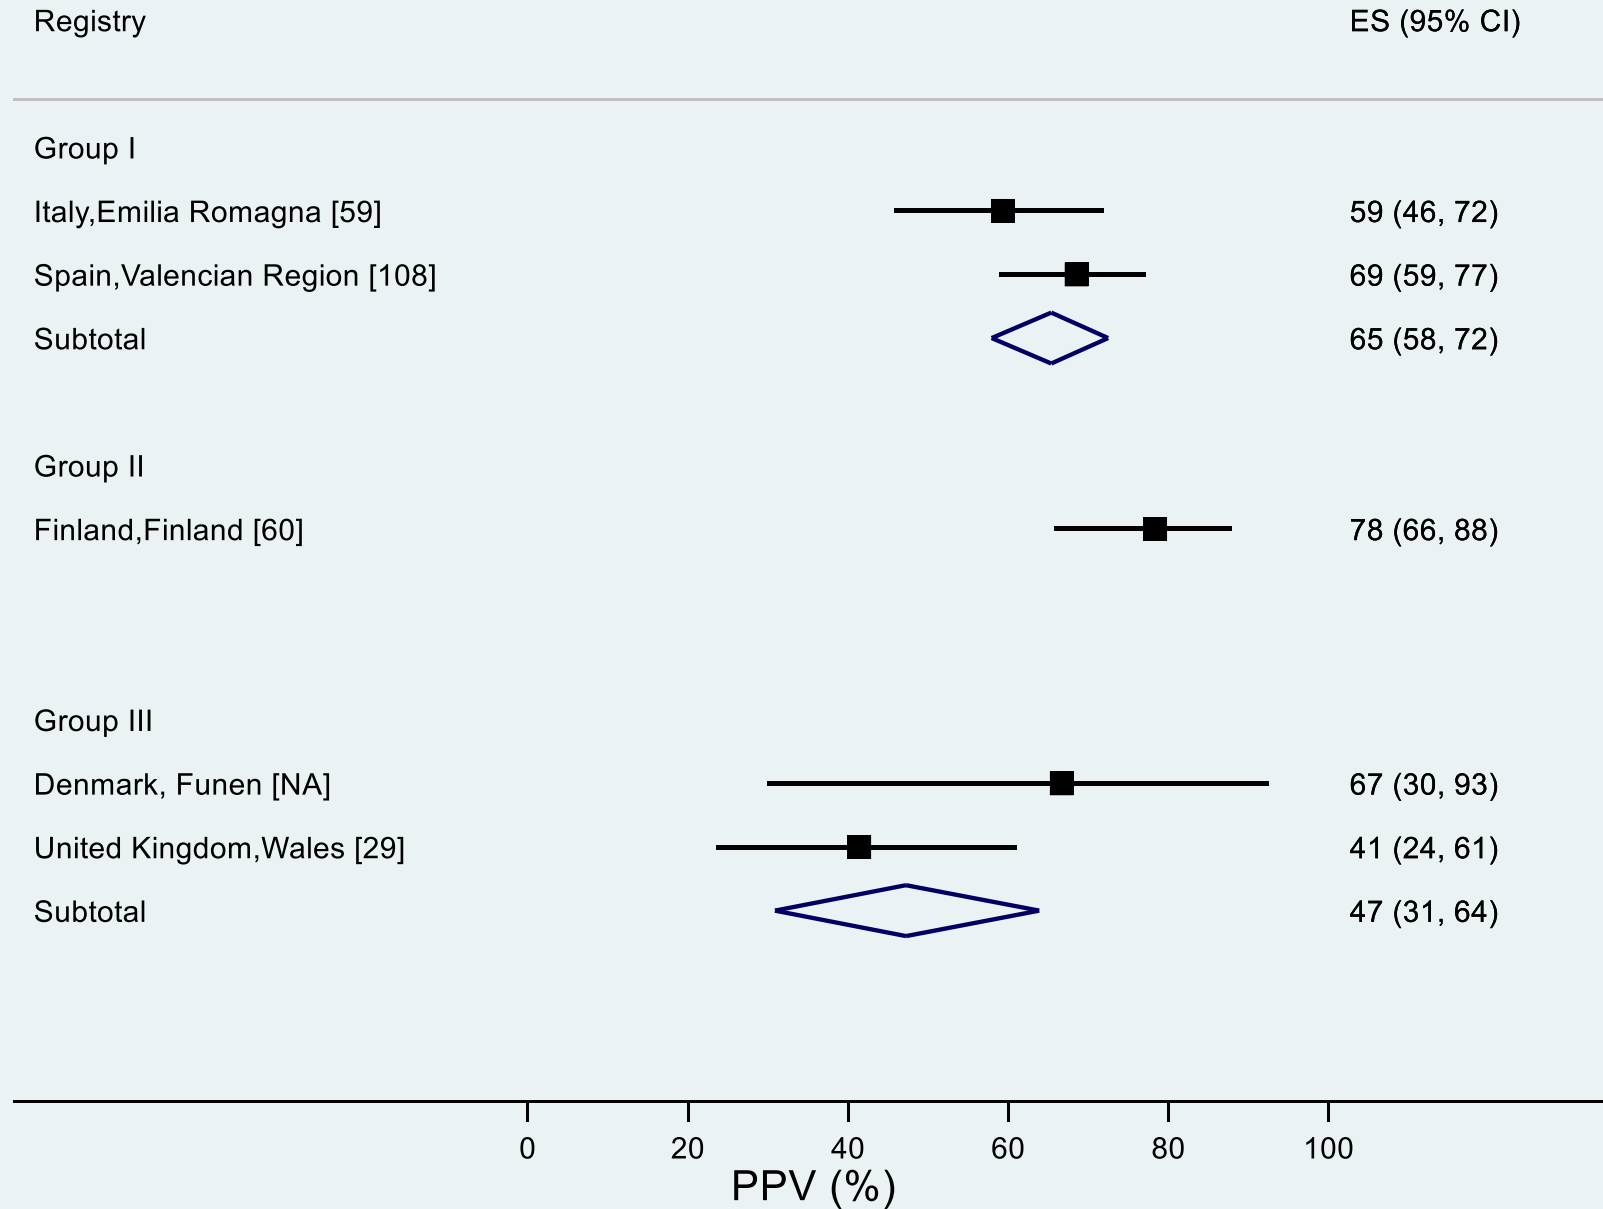

Anomalies usually diagnosed after discharge from the maternity unit

Estimates for PPV per registry, pooled estimates per group.

NA indicates that the number and/or the estimate cannot be reported because of release restrictions for small numbers.

# VSD

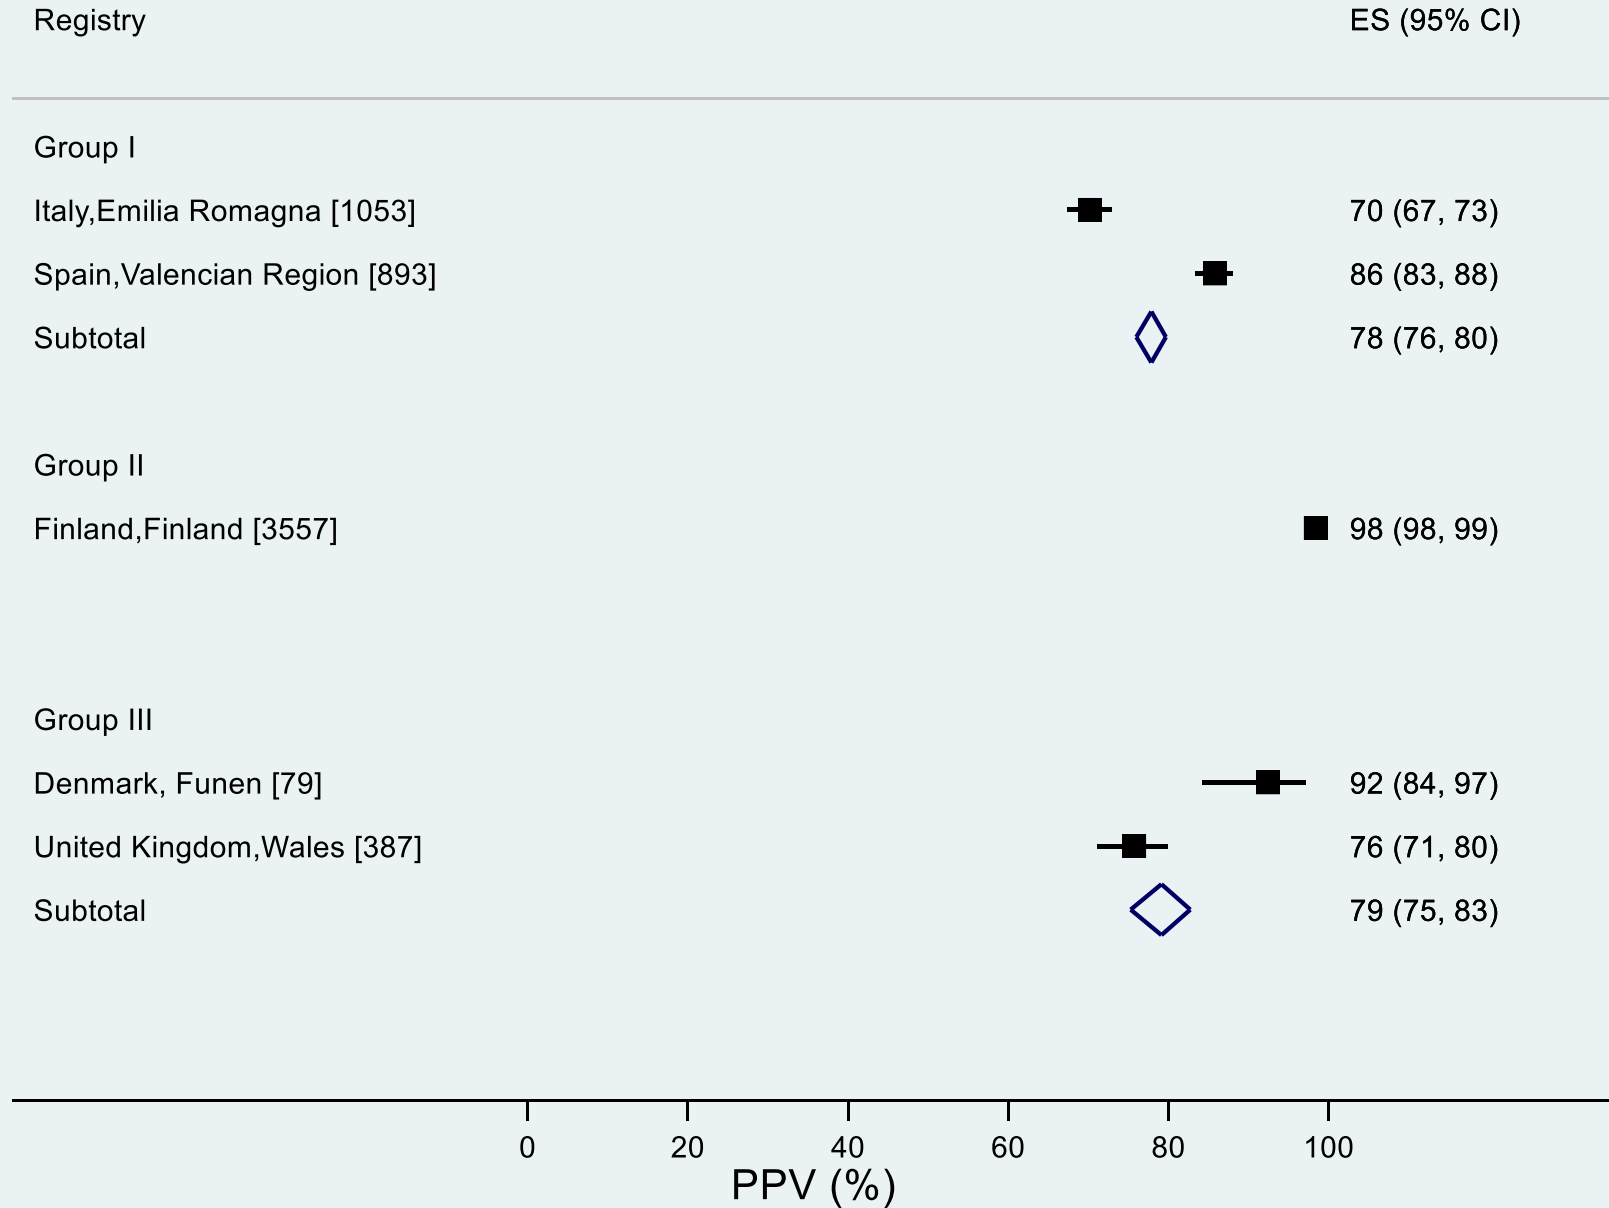

Anomalies usually diagnosed after discharge from the maternity unit

Estimates for PPV per registry, pooled estimates per group.

NA indicates that the number and/or the estimate cannot be reported because of release restrictions for small numbers.

# Hirschsprung disease

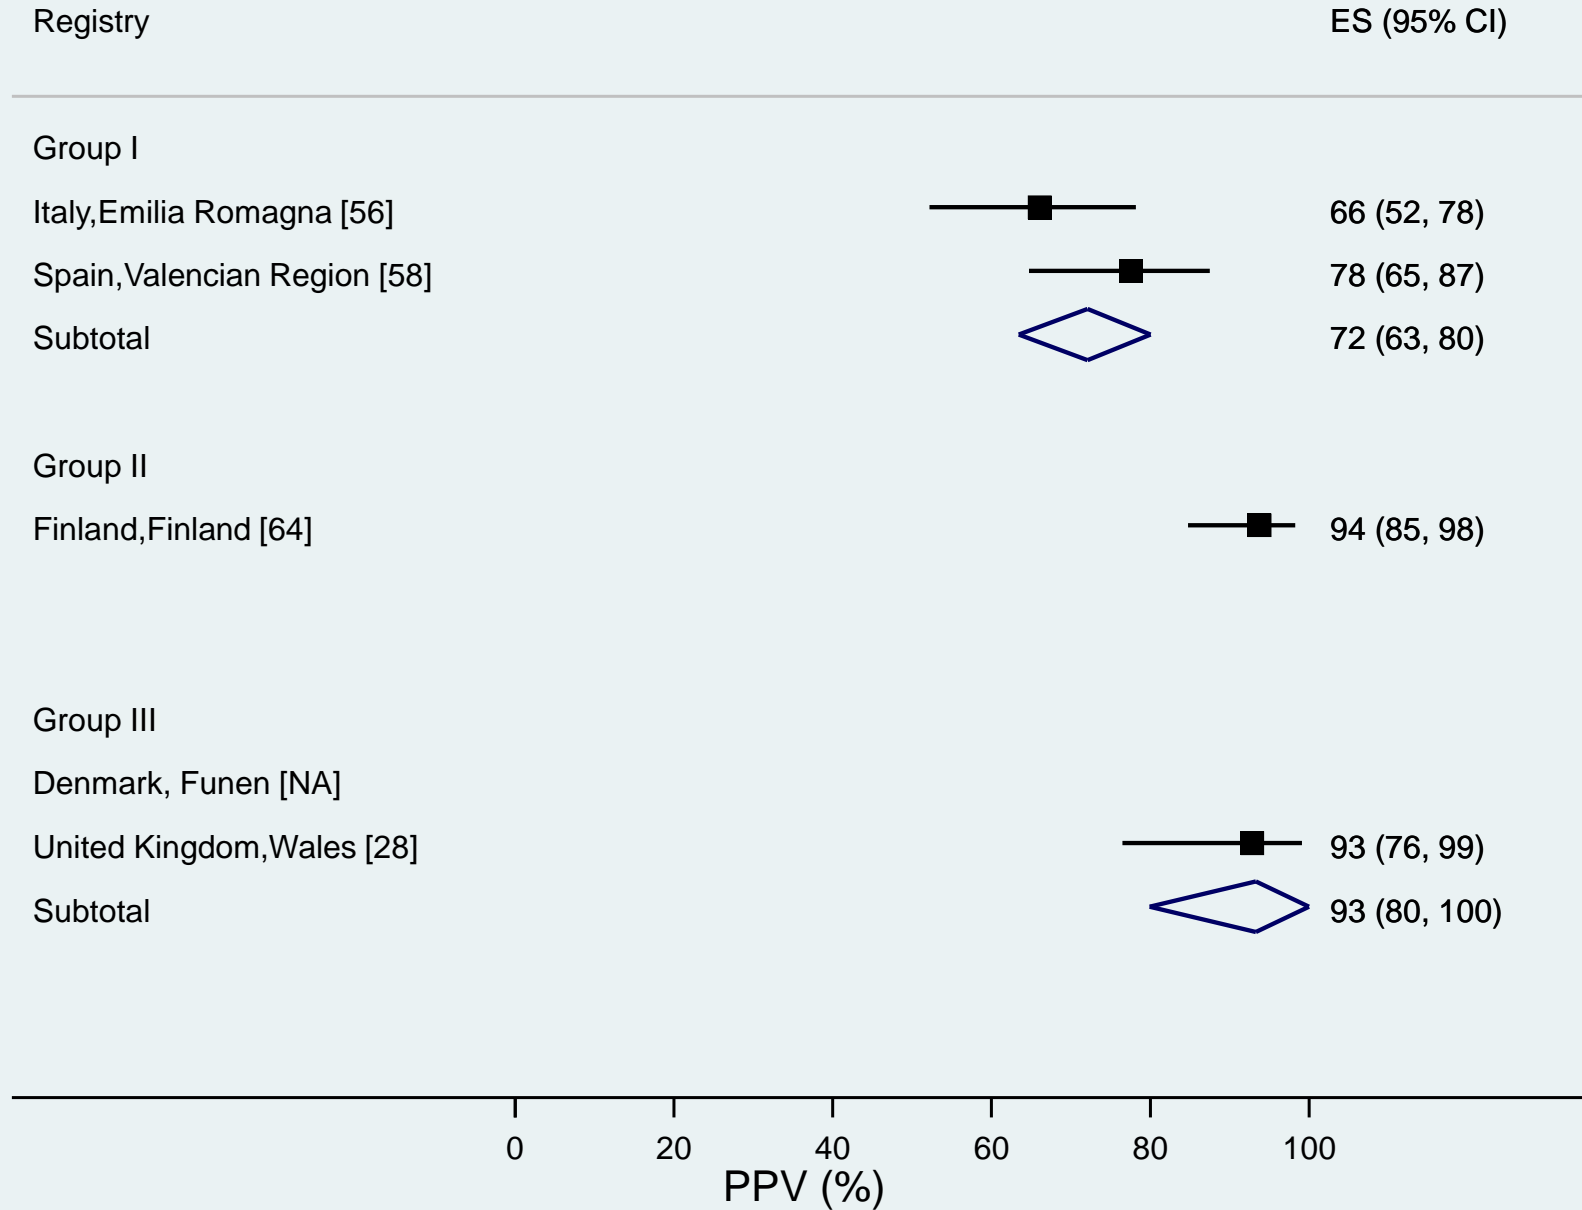

Anomalies that present in variable form between normal and abnormal

Estimates for PPV per registry, pooled estimates per group.

NA indicates that the number and/or the estimate cannot be reported because of release restrictions for small numbers.

# ASD

Registry ES (95% CI)

Group I

Italy, Emilia Romagna [1033] 28 (25, 31)

Spain, Valencian Region [2335] 12 (10, 13)

Subtotal 16 (15, 17)

Group II

Finland, Finland [1628] 41 (39, 43)

Group III

Denmark, Funen [146] 21 (14, 28)

United Kingdom, Wales [646] 14 (12, 17)

Subtotal 15 (13, 18)

0 20 40 60 80 100

PPV (%)

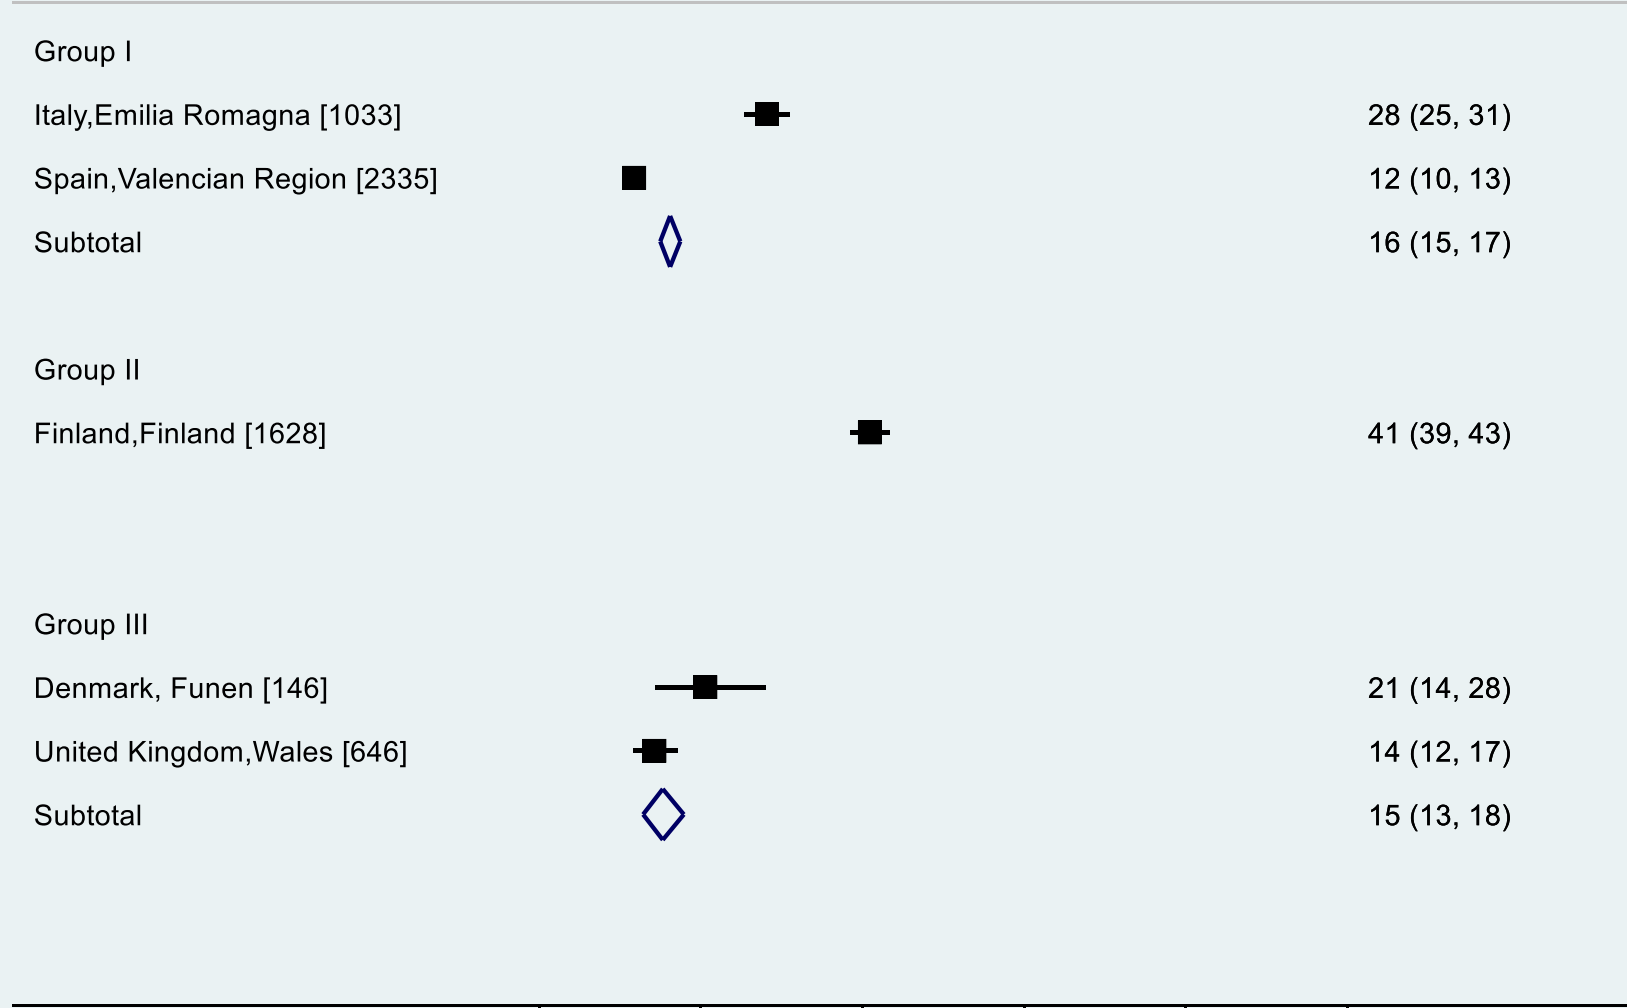

Anomalies that present in variable form between normal and abnormal

Estimates for PPV per registry, pooled estimates per group.

NA indicates that the number and/or the estimate cannot be reported because of release restrictions for small numbers.

# Hydronephrosis

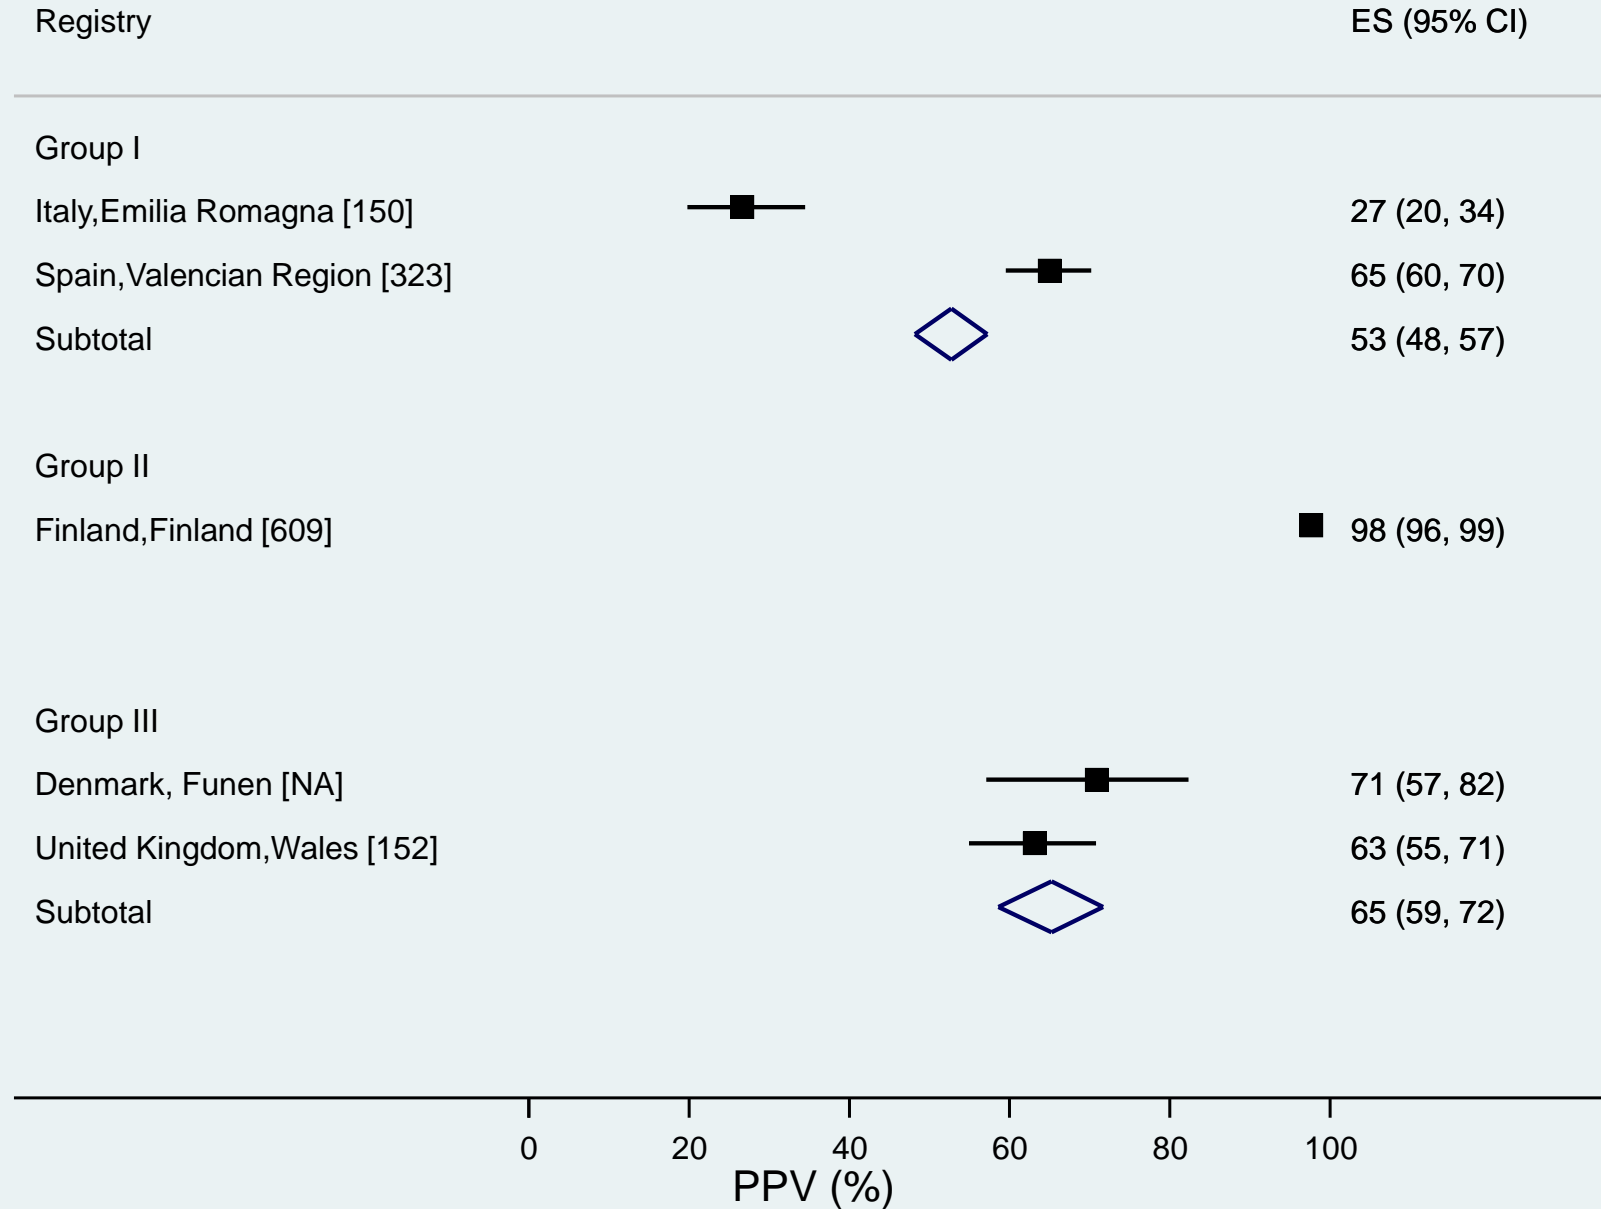

# Hypospadias

Registry

ES (95% CI)

Group I

Italy, Emilia Romagna [372]

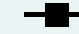

85 (81, 88)

Spain, Valencian Region [221]

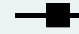

85 (80, 89)

Subtotal

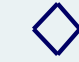

85 (82, 88)

Group II

Finland, Finland [240]

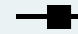

82 (77, 87)

Group III

Denmark, Funen [50]

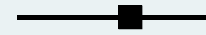

76 (62, 87)

United Kingdom, Wales [169]

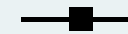

70 (62, 77)

Subtotal

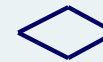

71 (65, 77)

0

20

40

60

80

100

PPV (%)

Anomalies that present in variable form between normal and abnormal

Estimates for PPV per registry, pooled estimates per group.

NA indicates that the number and/or the estimate cannot be reported because of release restrictions for small numbers.

# Chromosomal anomaly

Estimates for PPV per registry, pooled estimates per group.

NA indicates that the number and/or the estimate cannot be reported because of release restrictions for small numbers.

# Down syndrome

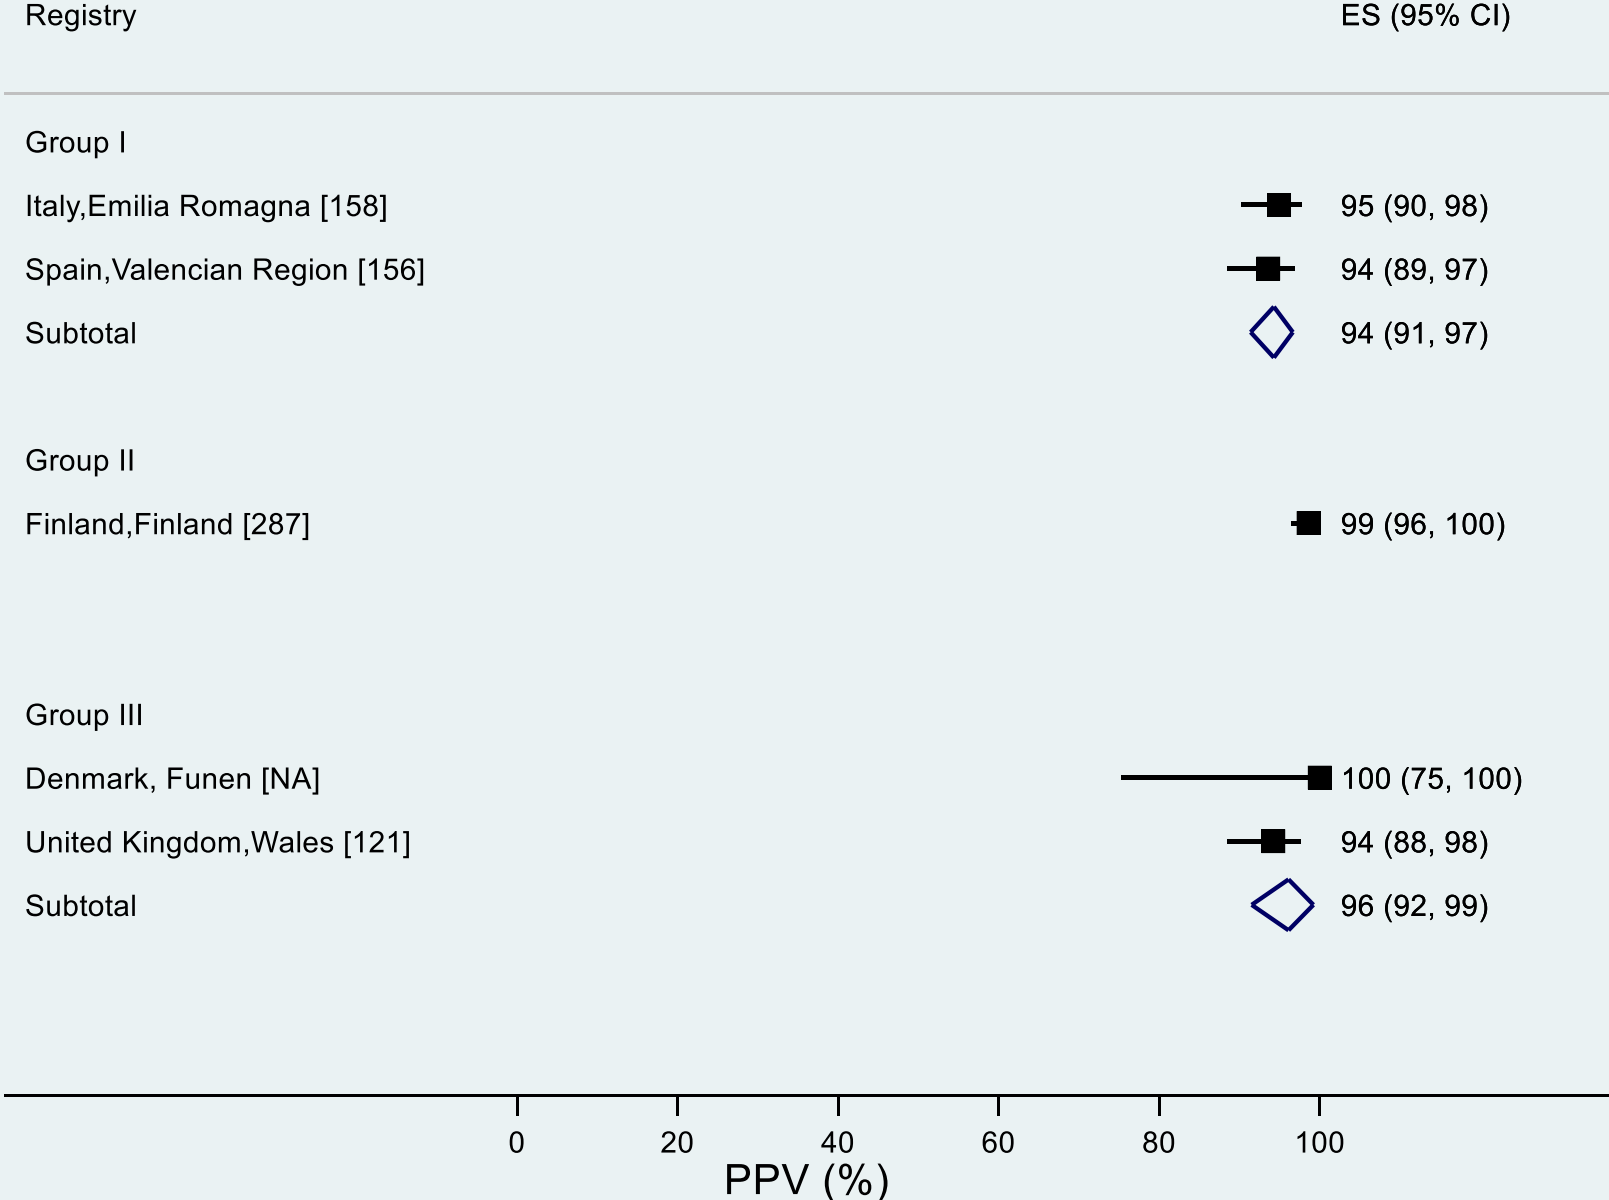



## Mild anomaly

Estimates for PPV per registry, pooled estimates per group.

NA indicates that the number and/or the estimate cannot be reported because of release restrictions for small numbers.

## Polydactyly

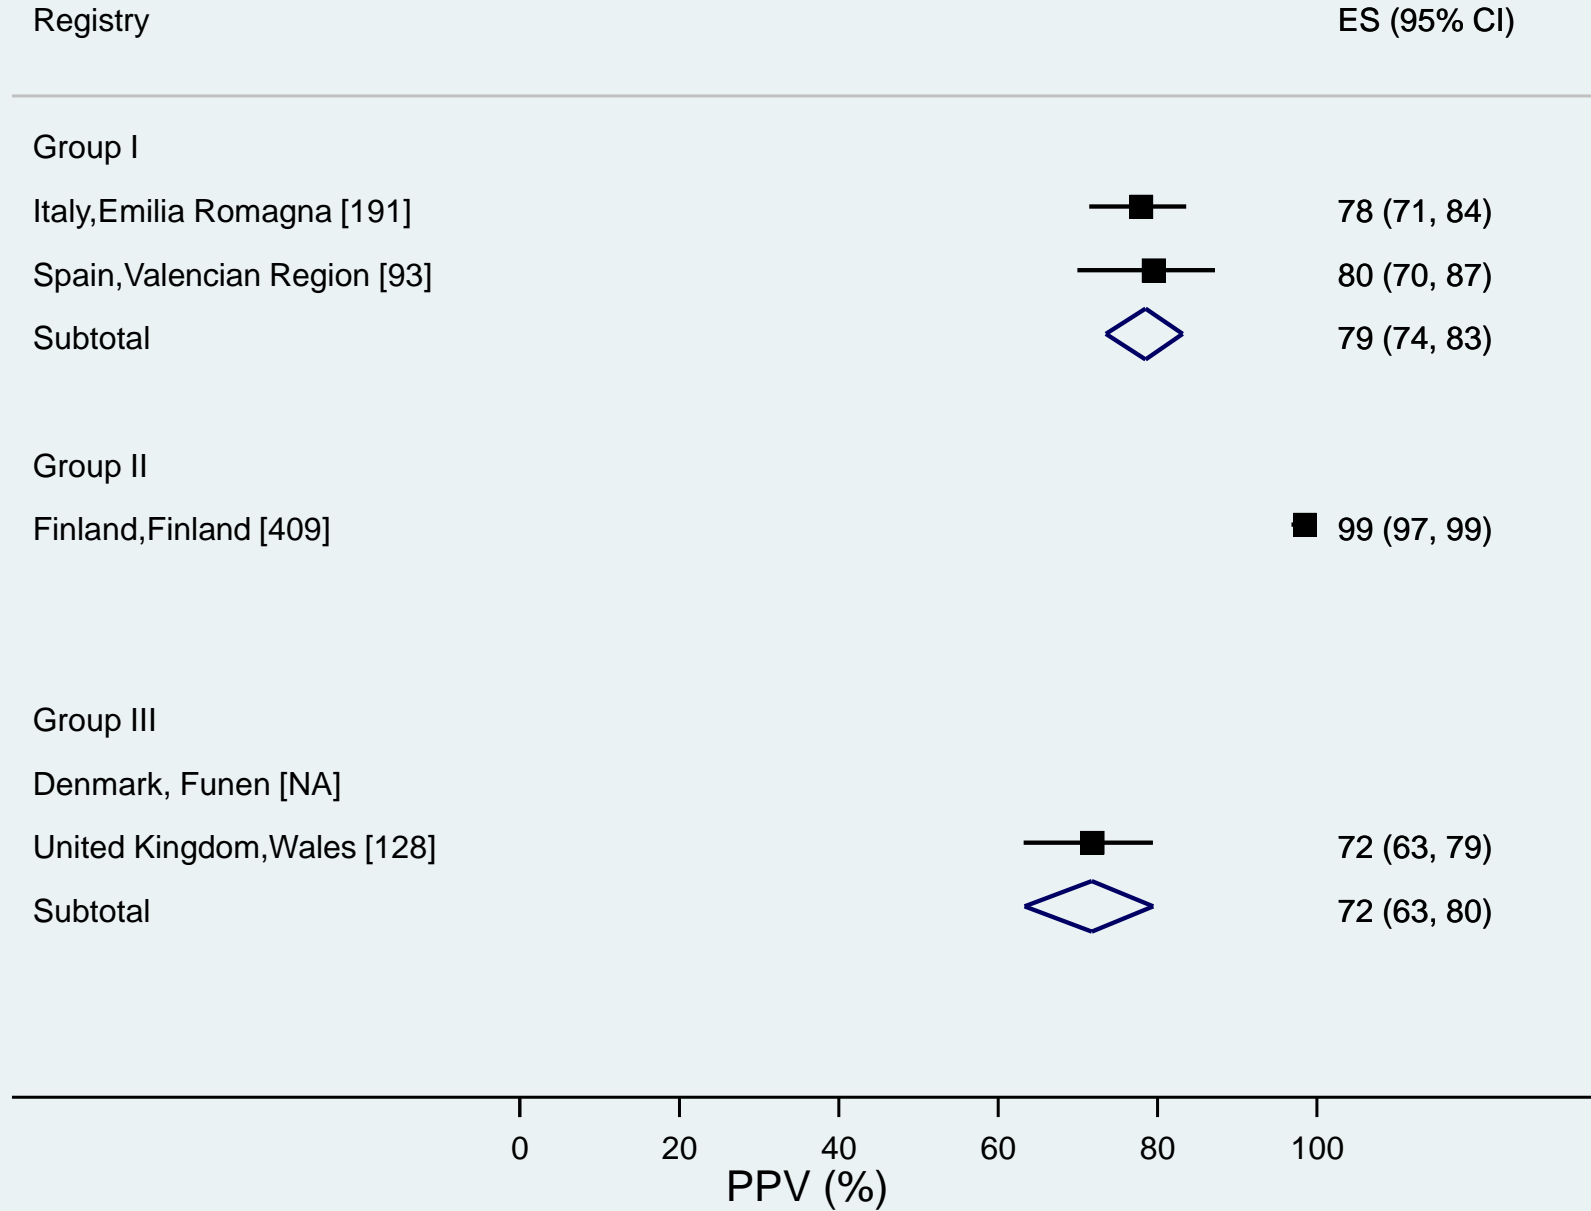

Supplement: MOESM3 [file 10654_2023_971_MOESM3_ESM.pdf]
